# Supplementary material for: Geographic variation in preventable hospitalisations across Canada: a cross-sectional study
Source: PubMed Central journal article supplement — BMJ Open. 2020 May 15;10(5):e037195. doi: 10.1136/bmjopen-2020-037195 (PMC7232620; doi:10.1136/bmjopen-2020-037195), 2020-05-15
Supplement: bmjopen-2020-037195.draft_revisions.pdf [file bmjopen-2020-037195.draft_revisions.pdf]

# BMJ Open

BMJ Open is committed to open peer review. As part of this commitment we make the peer review history of every article we publish publicly available.

When an article is published we post the peer reviewers' comments and the authors' responses online. We also post the versions of the paper that were used during peer review. These are the versions that the peer review comments apply to.

The versions of the paper that follow are the versions that were submitted during the peer review process. They are not the versions of record or the final published versions. They should not be cited or distributed as the published version of this manuscript.

BMJ Open is an open access journal and the full, final, typeset and author-corrected version of record of the manuscript is available on our site with no access controls, subscription charges or pay-per-view fees (<http://bmjopen.bmj.com>).

If you have any questions on BMJ Open's open peer review process please email [info.bmjopen@bmj.com](mailto:info.bmjopen@bmj.com)

# BMJ Open

## Geographic Variation in Preventable Hospitalizations Across Canada: A Spatial Analysis

|                               |                                                                                                                                                                                                                                                                                                                                                                                                                                                                                                                                                                                                                                                                                                                                                                                                                                                                                                                                                                                                                                                                                                                                                                                                                                                                                                                                                                                                                                                                                                                                                                                                                                |
|-------------------------------|--------------------------------------------------------------------------------------------------------------------------------------------------------------------------------------------------------------------------------------------------------------------------------------------------------------------------------------------------------------------------------------------------------------------------------------------------------------------------------------------------------------------------------------------------------------------------------------------------------------------------------------------------------------------------------------------------------------------------------------------------------------------------------------------------------------------------------------------------------------------------------------------------------------------------------------------------------------------------------------------------------------------------------------------------------------------------------------------------------------------------------------------------------------------------------------------------------------------------------------------------------------------------------------------------------------------------------------------------------------------------------------------------------------------------------------------------------------------------------------------------------------------------------------------------------------------------------------------------------------------------------|
| Journal:                      | <i>BMJ Open</i>                                                                                                                                                                                                                                                                                                                                                                                                                                                                                                                                                                                                                                                                                                                                                                                                                                                                                                                                                                                                                                                                                                                                                                                                                                                                                                                                                                                                                                                                                                                                                                                                                |
| Manuscript ID                 | bmjopen-2020-037195                                                                                                                                                                                                                                                                                                                                                                                                                                                                                                                                                                                                                                                                                                                                                                                                                                                                                                                                                                                                                                                                                                                                                                                                                                                                                                                                                                                                                                                                                                                                                                                                            |
| Article Type:                 | Original research                                                                                                                                                                                                                                                                                                                                                                                                                                                                                                                                                                                                                                                                                                                                                                                                                                                                                                                                                                                                                                                                                                                                                                                                                                                                                                                                                                                                                                                                                                                                                                                                              |
| Date Submitted by the Author: | 27-Jan-2020                                                                                                                                                                                                                                                                                                                                                                                                                                                                                                                                                                                                                                                                                                                                                                                                                                                                                                                                                                                                                                                                                                                                                                                                                                                                                                                                                                                                                                                                                                                                                                                                                    |
| Complete List of Authors:     | <p>Wilk, Piotr ; University of Western Ontario, Epidemiology &amp; Biostatistics, Paediatrics<br/>         Ali, Shehzad; University of Western Ontario, Epidemiology and Biostatistics<br/>         Anderson, Kelly; University of Western Ontario, Epidemiology &amp; Biostatistics<br/>         Clark, AF; University of Western Ontario, Geography; Children's Health Research Institute<br/>         Cooke, Martin; University of Waterloo, School of Public Health and Health Systems<br/>         Frisbee, Stephanie; University of Western Ontario, Pathology &amp; Laboratory Medicine, and Epidemiology &amp; Biostatistics<br/>         Gilliland, Jason; University of Western Ontario, Geography<br/>         Haan, Michael; University of Western Ontario, Sociology<br/>         Harris, Stewart; University of Western Ontario, Family Medicine<br/>         Kiarasi, Soushyant; University of Western Ontario, Epidemiology and Biostatistics<br/>         Maltby, Alana; University of Western Ontario, Epidemiology and Biostatistics<br/>         Norozi, Kambiz; University of Western Ontario, Paediatrics<br/>         Petrella, Robert; University of Western Ontario, Family Medicine<br/>         Sarma, Sisira; University of Western Ontario, Epidemiology &amp; Biostatistics<br/>         Singh, Sarah; University of Western Ontario, Epidemiology &amp; Biostatistics<br/>         Stranges, Saverio; University of Western Ontario, Epidemiology and Biostatistics<br/>         Thind, Amardeep; University of Western Ontario, Epidemiology and Biostatistics; Studies in Family Medicine</p> |
| Keywords:                     | EPIDEMIOLOGY, STATISTICS & RESEARCH METHODS, Quality in health care < HEALTH SERVICES ADMINISTRATION & MANAGEMENT                                                                                                                                                                                                                                                                                                                                                                                                                                                                                                                                                                                                                                                                                                                                                                                                                                                                                                                                                                                                                                                                                                                                                                                                                                                                                                                                                                                                                                                                                                              |
|                               |                                                                                                                                                                                                                                                                                                                                                                                                                                                                                                                                                                                                                                                                                                                                                                                                                                                                                                                                                                                                                                                                                                                                                                                                                                                                                                                                                                                                                                                                                                                                                                                                                                |

SCHOLARONE™  
Manuscripts

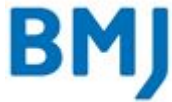

I, the Submitting Author has the right to grant and does grant on behalf of all authors of the Work (as defined in the below author licence), an exclusive licence and/or a non-exclusive licence for contributions from authors who are: i) UK Crown employees; ii) where BMJ has agreed a CC-BY licence shall apply, and/or iii) in accordance with the terms applicable for US Federal Government officers or employees acting as part of their official duties; on a worldwide, perpetual, irrevocable, royalty-free basis to BMJ Publishing Group Ltd ("BMJ") its licensees and where the relevant Journal is co-owned by BMJ to the co-owners of the Journal, to publish the Work in this journal and any other BMJ products and to exploit all rights, as set out in our [licence](#).

The Submitting Author accepts and understands that any supply made under these terms is made by BMJ to the Submitting Author unless you are acting as an employee on behalf of your employer or a postgraduate student of an affiliated institution which is paying any applicable article publishing charge ("APC") for Open Access articles. Where the Submitting Author wishes to make the Work available on an Open Access basis (and intends to pay the relevant APC), the terms of reuse of such Open Access shall be governed by a Creative Commons licence – details of these licences and which [Creative Commons](#) licence will apply to this Work are set out in our licence referred to above.

Other than as permitted in any relevant BMJ Author's Self Archiving Policies, I confirm this Work has not been accepted for publication elsewhere, is not being considered for publication elsewhere and does not duplicate material already published. I confirm all authors consent to publication of this Work and authorise the granting of this licence.

## Geographic Variation in Preventable Hospitalizations Across Canada

### Geographic Variation in Preventable Hospitalizations Across Canada: A Spatial Analysis

Piotr Wilk<sup>1\*</sup>, Shehzad Ali<sup>1</sup>, Kelly Anderson<sup>1</sup>, Andrew Clark<sup>2</sup>, Martin Cooke<sup>3</sup>, Stephanie Frisbee<sup>4</sup>,  
Jason Gilliland<sup>2</sup>, Michael Haan<sup>5</sup>, Stewart Harris<sup>6</sup>, Soushyant Kiarasi<sup>1</sup>, Alana Maltby<sup>1</sup>, Kambiz Norozi<sup>7</sup>,  
Robert Petrella<sup>6</sup>, Sisira Sarma<sup>1</sup>, Sarah Singh<sup>1</sup>, Saverio Stranges<sup>1</sup>, Amardeep Thind<sup>1</sup>

<sup>1</sup>Department of Epidemiology and Biostatistics, Western University, London, Canada

<sup>2</sup>Department of Geography, Western University, London, Canada

<sup>3</sup>School of Public Health and Health Systems, University of Waterloo, Waterloo, Canada

<sup>4</sup>Department of Pathology and Laboratory Medicine, Western University, London, Canada

<sup>5</sup>Department of Sociology, Western University, London, Canada

<sup>6</sup>Department of Family Medicine, Western University, London, Canada

<sup>7</sup>Department of Paediatrics, Western University, London, Canada

\* Corresponding Author - Piotr Wilk

P: 519-661-2111x89109, F: 519.661.3766, E: pwilk3@uwo.ca

Associate Professor

Department of Epidemiology & Biostatistics, Schulich School of Medicine and Dentistry, Western University, Kresge Building, Room K201, 1151 Richmond Street, London, Ontario, N6A 5C1

**Manuscript word count: 3,067**

## Geographic Variation in Preventable Hospitalizations Across Canada

### Abstract (261/300 words)

**Objective:** The objective of this study is to examine the magnitude and pattern of small-area geographic variation in rates of preventable hospitalizations for ACSC across Canada (excluding Québec).

**Design and Setting:** A cross-sectional study conducted in Canada (excluding Québec) using data from the 2006 Canadian Census Health and Environment Cohort (CanCHEC) linked prospectively to hospitalization records from the Discharge Abstract Database (DAD) for the three fiscal years: 2006-07, 2007-08, and 2008-09.

**Primary Outcome Measure:** Preventable hospitalizations (ambulatory care sensitive conditions)

**Participants:** The 2006 CanCHEC represents a population of 22,562,120 individuals in Canada (excluding Québec). Of this number, 2,940,150 (13.03 per cent) individuals were estimated to be hospitalized at least once during the 2006-09 fiscal years.

**Methods:** Age-standardized annualized ACSC hospitalization rates per 100,000 population were computed for each of the 190 Census Divisions. To assess the magnitude of Census Division-level geographic variation in rates of preventable hospitalizations, the global Moran's  $I$  statistic was computed. 'Hot spot' analysis was used to identify the pattern of geographic variation.

**Results:** The Moran's  $I$  statistic (Moran's  $I = 0.355$ ) suggests non-randomness in the spatial distribution of preventable hospitalizations. The findings from the 'hot spot' analysis indicate a cluster of Census Divisions located in predominantly rural and remote parts of Ontario, Manitoba, and Saskatchewan and in eastern and northern parts of Nunavut with significantly higher than average rates of preventable hospitalization.

**Conclusions:** The knowledge on the magnitude and pattern of small-area geographic variation in preventable hospitalizations can inform regional, provincial, and national decision makers on planning, allocation of resources and monitoring performance of health service providers.

## Geographic Variation in Preventable Hospitalizations Across Canada

### Keywords

Preventable hospitalizations; ambulatory care sensitive conditions; spatial analysis

### Strengths and limitations of this study

- Variation in rates of hospitalization for ambulatory care sensitive conditions is evident across larger geographic areas, including provinces and health regions in Canada.
- Our analysis indicates that there is a statistically significant level of spatial variation in preventable hospitalizations across Canada at the Census Division level.
- Census Divisions located in predominantly in rural and remote regions have higher rates of preventable hospitalizations than Census Divisions located in urban areas.
- To define geographic areas, the boundaries of Census Divisions were used and although results may differ depending on the definition of geographic units, the methodological approach adopted in this study is generalizable to other geographic units.
- Limitations of this study include the absence of hospitalization records in the Discharge Abstract Database from Québec, and the lower coverage rates for residents of the territories, young adults, individuals of lower SES, and rural residents.

## Geographic Variation in Preventable Hospitalizations Across Canada

### INTRODUCTION

Hospitalizations due to ambulatory care sensitive conditions (ACSC) are an important indicator of access and quality of primary care services [1-4], and therefore an important focus of health service research in Canada [1, 5, 6] and internationally [7-11]. Though not all hospitalizations are preventable, with appropriate screening, monitoring, management, and follow-up in primary care settings, many ACSC-related hospitalizations can be avoided [4, 12].

The Canadian Institute of Health Information (CIHI) compiles provincial and health region-level aggregated data on preventable hospitalizations related to the following ACSC: chronic obstructive pulmonary disease (COPD), asthma, heart failure and pulmonary edema, hypertension, angina, diabetes, and grand mal status and other epileptic convulsions [4]. The most recent, age-standardized Canadian estimates from CIHI indicate that in 2017-18, 327 per 100,000 population had an ACSC-related hospitalization, a decrease from 349 per 100,000 population in 2010 [13]. However, these national figures obscure substantial geographic variation in these rates, which has persisted since 2001 when such data became available [14]. In 2017-18, British Columbia had the lowest hospitalization rate for ACSC (294 per 100,000 population) and Nunavut had the highest rate (751 per 100,000 population), a rate approximately 2.5 times greater than in British Columbia [13]. There is also some evidence of substantial variation in these rates within provinces [6, 15-18]. Within Ontario, for example, in 2017-18, there was an almost three-fold difference in preventable hospitalization rates between the Central Local Health Integration Network (LHIN; 195 per 100,000 population) and the North-West LHIN (575 per 100,000 population, respectively) [13].

International research suggests that more pronounced differences in the rates of preventable hospitalizations may be found across smaller geographic areas (i.e., small-area variation), including administrative units responsible for the local delivery of primary care services [8, 10, 19, 20]. However, there is only limited Canadian research examining small-area variation in preventable hospitalizations. A 2008 report commissioned by the CIHI found substantial differences in age-standardized ACSC-

## Geographic Variation in Preventable Hospitalizations Across Canada

related hospitalization rates across 15 Census Metropolitan Areas (CMA), with Regina CMA having the highest rate of 518 per 100,000 population and Ottawa-Gatineau CMA reporting the lowest rate of 181 per 100,000 population [16]. The scope of this study, however, was restricted to a very limited number of large urban areas.

To address this gap, the objective of this study was to examine the magnitude and pattern of geographic variation in preventable hospitalizations in Canada (excluding Québec) across small geographic areas, defined by the boundaries of Census Divisions (CDs). CDs are standard census geographic units that generally correspond to municipalities, as determined by provincial and territorial legislation, or neighbouring municipalities amalgamated for the purposes of regional planning and managing some of the common services [21]. CDs vary in their areas and population sizes and, in 2006, there were 190 CDs in Canada (excluding Québec). A reference map of CDs can be found on the Statistics Canada website [22]. We hypothesized that the overall magnitude of geographic variation and the distribution of preventable hospitalizations across CDs in Canada is not random but rather exemplifies spatial dependence where CDs with lower and higher than average ACSC-related hospitalization rates are clustered together. The presence of small-area geographic differences in rates of potentially preventable hospitalizations may suggest the presence of substantial inequalities in access to appropriate primary care across CDs [6, 16, 17]. Thus, identifying CDs with disproportionately high rates of ACSC-related hospitalizations can support decision-makers in planning, allocation of resources, and monitoring performance of health service providers as well as lead to improvement in primary care quality to reduce the burden of preventable hospitalizations [23, 24]. Moreover, methodological approaches and findings from this baseline study can lend to further examination of whether or not clusters of CDs with lower or higher rates of preventable hospitalizations are emerging, stable, or declining.

## METHODS



## Geographic Variation in Preventable Hospitalizations Across Canada

**Data.** To assess the magnitude and pattern of geographic variation in rates of ACSC-related hospitalization, we used the 2006 Canadian Census Health and Environment Cohort (CanCHEC) linked prospectively to hospitalization records from the 2006-2009 Discharge Abstract Database (DAD). The 2006 CanCHEC consists of about 20 per cent of the non-institutional respondents to the 2006 Census of Canada who were given long-form census questionnaire, totaling over 4.6 million individuals. The cohort reliably captures characteristics of the entire Canadian population, residing in large metropolitan regions or small remote settlements [25] as it is representative of approximately 95-97 per cent of the provincial populations and 93-94 per cent of the territorial populations [25, 26].

The individual-level records for the members of the 2006 CanCHEC were recently linked by Statistics Canada to the Discharge Abstract Database (DAD) records for three fiscal years: 2006-07, 2007-08, and 2008-09 [27]. The DAD is a census of hospital discharges for all provinces and territories excluding Québec, which does not report hospitalization data to the DAD, and includes administrative and clinical data for approximately three million hospital discharges per year [28]. The DAD provides information on the main diagnoses, date of admission, and treatment information. Each hospital record consists of up to 25 diagnoses and 20 intervention codes based on the International Classification of Disease 10<sup>th</sup> Revision, Canadian Modification codes (ICD-10-CA) and volume four of the Canadian Classification of Health Interventions [29, 30].

The record linkage of the 2006 CanCHEC and 2006-09 DAD involved the hierarchical deterministic exact method [31], and was based on personal identifiers common to both data sources (i.e., date of birth, sex, and postal code). A validation study conducted by Statistics Canada indicated that linkage rates approached 100 per cent, with weighted coverage rates exceeding 80 per cent (i.e., the weighted CanCHEC represents over 80% of hospitalizations during the 2006-09 period), and that the linked files are suitable for health-related research as the data are broadly representative of the population of all provinces and territories, excluding Québec [27]. Methodological details on the 2006 CanCHEC, data linkage, and findings from the linkage validation study are available elsewhere [27].

## Geographic Variation in Preventable Hospitalizations Across Canada

**Rates of preventable hospitalizations.** Following the CIHI's previously established definition of ACSC, validated for use in Canada [4], we used the first three characters of each 'most responsible' diagnosis to identify ACSC-related hospitalization events. Selected ACSC include grand mal status and other epileptic convulsions, COPD, asthma, diabetes, heart failure and pulmonary edema, hypertension, and angina (excluding cases with cardiac procedures). For each CD, we computed age-standardized annualized ACSC hospitalization rate per 100,000 population. Specifically, hospitalization records over three fiscal years (i.e., 2006-07, 2007-08, and 2008-09) were pooled to produce a stable estimate of ACSC-related hospitalization rate in each CD and to detect differences between these geographic areas. Sampling weights were used in line with the 2006 census design. The estimated population-level counts of hospitalization events in each CD were rounded to a base of 5 as required by Statistic Canada's confidentiality procedures. The rate for each CD was computed by dividing the estimated annualized and rounded count of ACSC-related hospitalizations in that CD by the total population of that CD and then expressed as per 100,000 population. Finally, direct standardization was carried out using the entire 2006 Census Canada as the reference population and four age groups (i.e., 0-19 years, 20-39, 40-59, 60 and over).

**Statistical analysis.** To assess the magnitude of CD-level variation (i.e., spatial autocorrelation) in rates of preventable hospitalizations, we computed the global Moran's  $I$  statistic which assesses the degree to which rates are similar or dissimilar across geographic areas [32]. This was computed using the formula:

$$I = \left( \frac{n}{S_0} \right) \frac{\sum_{i=1}^n \sum_{j=1}^n w_{ij} z_i z_j}{\sum_{i=1}^n z_i^2}$$

where,  $z_i$  and  $z_j$  for areas  $i$  and  $j$  are the deviations from the mean,  $w_{ij}$  is the matrix of row-standardized weights, and

## Geographic Variation in Preventable Hospitalizations Across Canada

$$S_0 = \sum_{i=1}^n \sum_{j=1}^n w_{ij}$$

Moran's  $I$  values range from -1 to +1, which represent extreme negative and positive spatial correlations, respectively (i.e. CDs with either low or high preventable hospitalization rates are geographically clustered together) and 0 indicating spatial randomness (no spatial correlation across CDs). To test the null hypothesis of no spatial correlation, a Monte Carlo simulation was used with 1,000 random permutations to produce the rank of observed Moran's  $I$  in relation to the simulated values, with  $p < 0.05$  indicating statistical significance.

To determine the location of clusters of CDs with significantly lower (i.e., 'cold spots') or higher (i.e., 'hot spots') ACSC hospitalization rates, we assessed whether preventable hospitalization rate in each CD is closer to the rates of its neighbours or to the national average. This was achieved using the local indicator of spatial association (LISA) [32, 33] using the formula:

$$I_i = z_i \sum_{j=1}^n w_{ij} z_j$$

The statistical significance of LISA estimates was tested using a Monte Carlo simulation which compares the actual observed LISA values for each CD with the distribution of repeatedly randomized values. A LISA significance map was produced to identify clusters of CDs with significantly higher or lower rates of ACSC hospitalizations compared to their neighbors. All analyses were conducted using R [34].

## RESULTS

The 2006 CanCHEC represents a population of 22,562,120 individuals in Canada, except Québec. Of this number, 2,940,150 (13.03 per cent) individuals were estimated to be hospitalized at least once during the 2006-09 fiscal years. In total, the weighted number of hospitalization events reported by all members of this population was 4,762,195. Out of that number, 337,995 (7.10 per cent)

## Geographic Variation in Preventable Hospitalizations Across Canada

1  
2 events were ACSC-related hospitalizations. The most common ACSC diagnosis was COPD, followed  
3  
4 by heart failure and pulmonary edema, angina, diabetes, asthma, grand mal, and hypertension.  
5

6  
7 The overall annualized rate of preventable hospitalization for the 2006 CanCHEC for the 2006-  
8  
9 09 fiscal years was 499 per 100,000 population (see Table 1). The rates of ACSC-related  
10  
11 hospitalizations varied across provinces and territories from the lowest of 436 per 100,000 population  
12  
13 in British Columbia to the highest of 1,264 per 100,000 population in Nunavut. As hypothesized, the  
14  
15 across CD variation in these rates was even more pronounced than the variation across provinces, with  
16  
17 the rates ranging from the lowest of 266 per 100,000 population in the White Horse Plains area near the  
18  
19 city of Winnipeg in Manitoba to the highest of 2,131 per 100,000 population in Manitoulin, in central  
20  
21 Ontario. The median rate across all CDs was 693 per 100,000 population with the inter-quartile range  
22  
23 equal to 351 (i.e., from 564 and 915 per 100,000 population). Similarly, a substantial level of variation  
24  
25 can also be observed across CDs within each province. Figure 1 displays the rates of preventable  
26  
27 hospitalizations for all CDs in Canada (excluding Québec) and suggests that there is a substantial level  
28  
29 of variation in these rates across Canada and within each province and territory. In general, the rates  
30  
31 appear to be highest in CDs located in the northern parts of Newfoundland and Labrador, New  
32  
33 Brunswick, Ontario, Manitoba, Saskatchewan, and Alberta. They are also relatively high in the interior  
34  
35 of British Columbia and in some parts of Nunavut and the Northwest Territories.  
36  
37  
38  
39  
40  
41  
42  
43  
44  
45  
46  
47  
48  
49  
50  
51  
52  
53  
54  
55  
56  
57  
58  
59  
60

Geographic Variation in Preventable Hospitalizations Across Canada

**Table 1. Ambulatory Care Sensitive Condition Hospitalization Rates across Provinces and Census Divisions, Canada 2006-2009**

---

*ACSC rates across CDs within each province*

---

| <b>Province</b>           | <b>Population (1)</b> | <b>ACSC Events (2)</b> | <b>ACSC Rates (3)</b> | <b># CDs</b> | <b>Lowest</b> | <b>Median</b> | <b>Highest</b> |
|---------------------------|-----------------------|------------------------|-----------------------|--------------|---------------|---------------|----------------|
| Newfoundland and Labrador | 474,405               | 9,265                  | 651                   | 11           | 513           | 513           | 1,054          |
| Prince Edward Island      | 125,800               | 2,720                  | 721                   | 3            | 672           | 779           | 780            |
| Nova Scotia               | 853,525               | 13,335                 | 521                   | 18           | 368           | 643           | 1,353          |
| New Brunswick             | 696,650               | 17,465                 | 836                   | 15           | 566           | 846           | 1,094          |
| Ontario                   | 11,428,170            | 154,715                | 451                   | 49           | 296           | 581           | 2,131          |
| Manitoba                  | 1,082,900             | 19,595                 | 603                   | 23           | 266           | 827           | 2,112          |
| Saskatchewan              | 907,630               | 23,375                 | 858                   | 18           | 518           | 1,063         | 1,576          |
| Alberta                   | 3,088,730             | 45,325                 | 489                   | 19           | 373           | 708           | 1,401          |
| British Columbia          | 3,810,320             | 49,850                 | 436                   | 28           | 331           | 616           | 1,244          |
| Yukon                     | 28,770                | 460                    | 533                   | 1            | 533           | 533           | 533            |
| Northwest Territories     | 38,440                | 875                    | 759                   | 2            | 667           | 876           | 1,085          |
| Nunavut                   | 26,775                | 1,015                  | 1,264                 | 3            | 564           | 1,215         | 1,540          |
| Canada                    | 22,562,120            | 337,995                | 499                   | 190          | 266           | 693           | 2,131          |

---

ACSC, Ambulatory Care Sensitive Condition; CD, Census Division

(1) 2006 population size rounded to a base of 10

(2) Estimated population-level counts of ACSC hospitalization events rounded to a base of 5

(3) Standardized and annualized ACSC hospitalization rates per 100,000 population

## Geographic Variation in Preventable Hospitalizations Across Canada

[Insert Figure 1]

The Moran's  $I$  statistic, computed to assess the overall magnitude of variation in preventable hospitalization rates across CDs, was 0.3550 (expected value = -0.0053; variance = 0.0026) suggesting that the overall spatial distribution of preventable hospitalizations across CDs is non-random. The results from the Monte-Carlo simulation of Moran's  $I$  indicated that the null hypothesis of no spatial correlation can be rejected (the rank of the observed Moran's  $I$  = 1,000; the pseudo  $p$ -value = 0.001).

Figure 2 presents the findings from the LISA analysis and depicts the pattern of clustering of CDs with significantly higher ('hot spots') and lower ('cold spots') rates of preventable hospitalizations. It indicates that a relatively large cluster of CDs with higher than average hospitalization rates was located in northern parts of Ontario, Manitoba, and Saskatchewan and across eastern and northern parts of Nunavut ('hot spots'). In addition, two clusters of CDs with lower than average rates ('cold spots') were found, one in the Greater Toronto Area, and one in central Nova Scotia, around the town of Windsor.

[Insert Figure 2]

### DISCUSSION

This study addresses an important gap in the literature by providing information on the magnitude and pattern of geographic variation in preventable hospitalizations in Canada. Specifically, our study contributes to the literature by: (1) providing a quantitative assessment of the magnitude of spatial variation in preventable hospitalizations across small geographic areas (i.e., CDs); (2) identifying geographic areas with significantly lower or higher concentrations of these events (i.e., 'cold spots' and 'hot spots', respectively); and (3) demonstrating how spatial analysis can be applied to future studies of geographic variation in preventable hospitalizations that may involve data on newer census cohorts linked to more recent hospitalization records, when these data become available.

Overall, the results of the spatial analysis provide support for the hypothesis that there is a statistically significant and substantial level of spatial variation in preventable hospitalizations across

## Geographic Variation in Preventable Hospitalizations Across Canada

Canada and clustering of CDs with significantly lower and higher rates, which is a novel finding as the previous studies did not conduct any formal statistical assessment of the magnitude or patterns of geographic variations. The presence of a large cluster of CDs with higher than average ACSC-related hospitalization rates, stretching from northern parts of Ontario, Manitoba, and Saskatchewan and across eastern and northern parts of Nunavut, indicates that CDs with significantly higher rates of preventable hospitalizations are more likely to cluster in northern, predominantly rural and remote regions of Canada. In a CIHI report, rural areas in Canada were found to have approximately 60 per cent higher rates of preventable hospitalizations compared to urban areas [14], potentially due to poor access to primary care in these locations [35, 36]. In contrast, two ‘cold spots’, characterized by lower than average rates of preventable hospitalizations, were found in predominately urban areas (i.e., in the Greater Toronto Area and in the urban area of Nova Scotia). This pattern is likely related to differential levels of primary care supply in rural and urban areas as characteristics of the health care system that stem from barriers related to access to and quality of primary care services is one of the major driver of geographic variation in preventable hospitalizations [7, 23, 24].

It is important to acknowledge that, in addition to availability of health care services, the magnitude and pattern of geographic variation in preventable hospitalizations may also be related to differences in socio-demographics, health behaviors, and/or health status characteristics of the individuals residing in each CD (i.e., compositional effect) or to other area-level factors. Berlin et al. [8] argue that although an effective primary care system should aid in the prevention of ACSC-related hospitalizations, these events are also dependent on individual-level factors such as propensity to seek care, severity of disease, compliance issues, financial constraints, or accessibility issues. Research by Falster and colleagues [20] suggests that as much as 36.9 per cent of geographic variation in preventable hospitalizations in Australia was a result of individual-level sociodemographic and health characteristics. The geographic variation in preventable hospitalizations may, in particular, be driven by the well-known social gradient in health, as described by Marmot and colleagues [37]. In a 2008

## Geographic Variation in Preventable Hospitalizations Across Canada

study involving 15 CMA areas, for instance, hospitalizations for ACSC were highest among those with low socio-economic status (SES) and showed a steep gradient between low SES, average SES, and high SES [16]. Thus, further examination of the determinants of geographic variation, with a focus on individual-level factors, would help ascertain why residents of some CDs are more (or less) likely to be hospitalized for an ACSC, compared to residents in other areas of Canada.

**Limitations.** One limitation of any analysis involving the DAD is the absence of hospitalization records from Québec. Since these records are currently not shared with the CIHI or Statistics Canada, we were not able to directly address this limitation. Second, the validation study of the 2006 CanCHEC-DAD linked files indicated that coverage rates were slightly lower for residents of the territories, young adults, individuals of lower SES, and rural residents [27]; however, sampling weights used to extrapolate the observed counts to the whole population accounted for some of this underrepresentation. Furthermore, the boundaries of CDs were used in this study to define geographic areas. Although the Modifiable Areal Unit Problem indicates that the results may differ depending on the definition of geographic units [38-40], the methodological approach adopted in this study is generalizable to other geographic units. The results of this study are also based on the assumption that during the 2006-09 time period, members of the 2006 CanCHEC did not move from CDs that they reported as their home addresses in the 2006 Census; however, residential mobility within the boundaries of each CD would not affect the results. Lastly, estimates generated from the recently released 2006 CanCHEC-DAD linked files may not reflect the current rates of preventable hospitalization in Canada. However, at present, these are the best national data that are available for conducting analysis on small-area geographic variation in preventable hospitalizations. Moreover, for surveillance purposes, findings from the current study can be used as a baseline estimate to be compared with the results of future assessments of geographic variation in preventable hospitalization involving linked files from newer census cohorts, when these data become available.

## CONCLUSIONS



## Geographic Variation in Preventable Hospitalizations Across Canada

1  
2 The knowledge on the magnitude and pattern of small-area geographic variation in preventable  
3  
4 hospitalizations can inform regional, provincial, and national decision makers on planning resources  
5  
6 and monitoring performance of health service providers. Since preventable hospitalizations are an  
7  
8 important indicator of access and quality of primary care services, identifying of clusters of CDs with  
9  
10 disproportionately high rates of ACSC-related hospitalizations can lead to improvement in primary care  
11  
12 quality in these areas to reduce the burden of preventable hospitalizations. Ultimately, this can lead to  
13  
14 the reduction of substantial inequalities in the rates of preventable hospitalizations across Canada.  
15  
16

17  
18 The current study provides valuable insight into small-area geographic variation in preventable  
19  
20 hospitalizations in Canada. We found that the pattern of ‘hot spots’ in ACSC-related hospitalizations  
21  
22 do not follow provincial boundaries, which is a novel observation in the Canadian context and suggests  
23  
24 the need to focus on intra-provincial comparisons. As suggested by the existing literature, there may be  
25  
26 a wide range of interrelated factors that can potentially contribute to this variation. Although it is often  
27  
28 assumed that small-area geographic variation in preventable hospitalizations is related to characteristics  
29  
30 of the health care system, this variation may also be related to individual- and area-level socioeconomic  
31  
32 factors rooted in the local contexts [10, 20, 23]. Ultimately, people interact with the health care system  
33  
34 in the geographic areas in which they reside, and future research should assess the nature of these  
35  
36 interactions and how they may contribute to the observed geographic variation in ACSC-related  
37  
38 hospitalizations.  
39  
40  
41  
42  
43  
44  
45  
46  
47  
48  
49  
50  
51  
52  
53  
54  
55  
56  
57  
58  
59  
60

## Geographic Variation in Preventable Hospitalizations Across Canada

### **Funding**

This research was funded by the Schulich School of Medicine & Dentistry through the Collaborative Research Seed Grant and by the Children's Health Foundation.

### **Contributors**

All authors contributed to the design of the study. PW planned and undertook statistical analysis and interpretation. PW and AM drafted and finalized the manuscript with review by SA, KA, AC, MC, SF, JG, MH, SH, SK, KN, RP, S Sarma, S Singh, S Stranges, and AT. All authors reviewed, commented on and approved the final manuscript. The corresponding author attests that all listed authors meet authorship criteria and that no others meeting the criteria have been omitted. PW had full access to the data.

### **Ethics**

Ethical approval for this study was not required as the study uses anonymous and confidential secondary data from Statistics Canada. Consent from respondents was obtained at the time of data collection. Data were provided by Statistics Canada through the Research Data Centres program and accessed under the *Statistics Act* of Canada. The analyses and the interpretation are the authors' alone.

### **Patient and Public Involvement**

Patients were not involved in this study.

### **Data availability statement**

No data are available.

## Geographic Variation in Preventable Hospitalizations Across Canada

## References

- 1 Sanmartin C, Khan S, LHAD Research Team. Hospitalizations for Ambulatory Care Sensitive Conditions (ACSC): The factors that matter. *Health Research Working Paper Series*. Ottawa: Statistics Canada, Health Information and Research Division 2011:30.
- 2 Magan P, Otero A, Alberquilla A, *et al*. Geographic variations in avoidable hospitalizations in the elderly, in a health system with universal coverage. *BMC Health Services Research* 2008;**8**. doi:10.1186/1472-6963-8-42
- 3 Brown AD, Goldacre MJ, Hicks N, *et al*. Hospitalization for ambulatory care-sensitive conditions: a method for comparative access and quality studies using routinely collected statistics. *Canadian journal of public health = Revue canadienne de sante publique* 2001;**92**:155-9.
- 4 Canadian Institute for Health Information. Ambulatory Care Sensitive Conditions. CIHI 2017. Retrieved from <http://indicatorlibrary.cihi.ca/display/HSPIL/Ambulatory+Care+Sensitive+Conditions>
- 5 Cloutier-Fisher D, Penning MJ, Zheng C, *et al*. The devil is in the details: trends in avoidable hospitalization rates by geography in British Columbia, 1990-2000. *BMC Health Serv Res* 2006;**6**:104. doi:10.1186/1472-6963-6-104
- 6 Sanchez M, Vellanky S, Herring J, *et al*. Variations in Canadian rates of hospitalization for ambulatory care sensitive conditions. *Healthcare quarterly (Toronto, Ont)* 2008;**11**:20-2.
- 7 Billings J, Anderson GM, Newman LS. Recent findings on preventable hospitalizations. *Health affairs (Project Hope)* 1996;**15**:239-49. <http://content.healthaffairs.org/content/15/3/239.full.pdf>
- 8 Berlin C, Busato A, Rosemann T, *et al*. Avoidable hospitalizations in Switzerland: a small area analysis on regional variation, density of physicians, hospital supply and rurality. *BMC Health Services Research* 2014;**14**:289. doi:10.1186/1472-6963-14-289
- 9 Weeks WB, Ventelou B, Paraponaris A. Rates of admission for ambulatory care sensitive conditions in France in 2009–2010: trends, geographic variation, costs, and an international comparison. *European Journal of Health Economics* 2016;**17**:453-70. doi:10.1007/s10198-015-0692-y

## Geographic Variation in Preventable Hospitalizations Across Canada

- 1  
2 10 Ansari Z, Rowe S, Ansari H, *et al.* Small area analysis of ambulatory care sensitive conditions  
3  
4 in Victoria, Australia. *Popul Health Manag* 2013;**16**:190-200. doi:10.1089/pop.2012.0047  
5  
6 11 Busby J, Purdy S, Hollingworth W. How do population, general practice and hospital factors  
7  
8 influence ambulatory care sensitive admissions: a cross sectional study. *BMC Family Practice* 2017;**18**.  
9  
10 doi:10.1186/s12875-017-0638-9  
11  
12 12 Walker RL, Chen G, McAlister FA, *et al.* Hospitalization for uncomplicated hypertension: An  
13  
14 ambulatory care sensitive condition. *Canadian Journal of Cardiology* 2013;**29**:1462-9.  
15  
16 doi:10.1016/j.cjca.2013.05.002  
17  
18 13 Canadian Institute for Health Information. Your Health System - Ambulatory Care Sensitive  
19  
20 Conditions. CIHI 2019. Retrieved from  
21  
22 <https://yourhealthsystem.cihi.ca/hsp/indepth?lang=en#/indicator/019/2/C5001/>  
23  
24  
25 14 Canadian Institute for Health Information. Health Indicators. Ottawa, ON 2008. Retrieved from  
26  
27 [https://secure.cihi.ca/free\\_products/HealthIndicators2008\\_ENGweb.pdf](https://secure.cihi.ca/free_products/HealthIndicators2008_ENGweb.pdf)  
28  
29  
30 15 Lin G, Allan DE, Penning MJ. Examining Distance Effects on Hospitalizations Using GIS: A  
31  
32 Study of Three Health Regions in British Columbia, Canada. *Environment and Planning A*  
33  
34 2002;**34**:2037-53. doi:10.1068/a3528  
35  
36 16 Canadian Institute for Health Information. Reducing Gaps in Health: A Focus on Socio-  
37  
38 Economic Status in Urban Canada. Ottawa, ON 2008.  
39  
40  
41 17 Manitoba Centre for Health Policy and Evaluation. Concept: Ambulatory Care Sensitive (ACS)  
42  
43 Conditions. 2007. Retrieved from <http://mchp->  
44  
45 [appserv.cpe.umanitoba.ca/viewConcept.php?conceptID=1023](http://mchp-appserv.cpe.umanitoba.ca/viewConcept.php?conceptID=1023)  
46  
47  
48 18 Fransoo R, Martens P, The Need to Know Team, *et al.* The 2013 RHA Indicators Atlas.  
49  
50  
51  
52  
53  
54  
55  
56  
57  
58  
59  
60

## Geographic Variation in Preventable Hospitalizations Across Canada

19 Arandelovic A, Acampora A, Federico B, *et al.* The use of preventable hospitalization for monitoring the performance of local health authorities in long-term care. *Health Policy* 2018.

doi:10.1016/j.healthpol.2018.01.008

20 Falster MO, Jorm LR, Douglas KA, *et al.* Sociodemographic and health characteristics, rather than primary care supply, are major drivers of geographic variation in preventable hospitalizations in Australia. *Medical Care* 2015;**53**:436-45. doi:10.1097/MLR.0000000000000342

21 Statistics Canada. Census division (CD). 2015. Retrieved from

<http://www12.statcan.gc.ca/census-recensement/2011/ref/dict/geo008-eng.cfm>

22 Statistics Canada. Census Divisions, 2006 Reference Maps. 2006. Retrieved from

[http://www12.statcan.gc.ca/census-recensement/2011/geo/map-carte/pdf/030114\\_0304-0418\\_2006.pdf](http://www12.statcan.gc.ca/census-recensement/2011/geo/map-carte/pdf/030114_0304-0418_2006.pdf)

23 Ansari Z, Laditka JN, Laditka SB. Access to Health Care and Hospitalization for Ambulatory Care Sensitive Conditions. *Medical Care Research and Review* 2006;**63**:719-41.

doi:doi:10.1177/1077558706293637

24 Rosano A, Loha CA, Falvo R, *et al.* The relationship between avoidable hospitalization and accessibility to primary care: a systematic review. *Eur J Public Health* 2013;**23**:356-60.

doi:10.1093/eurpub/cks053

25 Statistics Canada. 2006 Census of Population. Statistics Canada 2006. Retrieved from

<http://www12.statcan.gc.ca/census-recensement/2006/index-eng.cfm>

26 Statistics Canada. Census Profile, 2016 Census. 2018. Retrieved from

<http://www12.statcan.gc.ca/census-recensement/2016/dp-pd/prof/index.cfm?Lang=E>

27 Rotermann M, Sanmartin C, Trudeau R, *et al.* Linked 2006 Census and hospital data in Canada. *Health Reports* 2015;**26**:10-20. <http://www.statcan.gc.ca/pub/82-003-x/2015010/article/14228-eng.pdf>

28 Canadian Institute for Health Information. Data Quality Documentation, Discharge Abstract Database—Multi-Year Information. Ottawa: CIHI 2012. Retrieved from

[https://www.cihi.ca/en/dad\\_multi-year\\_en.pdf](https://www.cihi.ca/en/dad_multi-year_en.pdf)

## Geographic Variation in Preventable Hospitalizations Across Canada

29 Canadian Institute for Health Information. International Statistical Classification of Diseases and Related Health Problems, 10th Revision. Ottawa: CIHI 2006.

30 Canadian Institute for Health Information. Canadian Classification of Health Interventions.

Ottawa, ON 2006. Retrieved from

[http://hcaiinfo.ca/Health\\_Care\\_Facility\\_Provider/documents/appendices/CCI\\_Vol4\\_2006%20Alpha%20Index.pdf](http://hcaiinfo.ca/Health_Care_Facility_Provider/documents/appendices/CCI_Vol4_2006%20Alpha%20Index.pdf)

31 Bernier J, Nobrega K. Overview of record linkage. *SYMPOSIUM 99: Combining Data from Different Sources*. Ottawa, ON: Statistics Canada 1999.

32 Moran PA. A test for the serial independence of residuals. *Biometrika* 1950;**37**:178-81.

doi:10.2307/2332162

33 Anselin L. Local Indicators of Spatial Association-LISA. *Geographical Analysis* 1995;**27**:93-115. doi:10.1111/j.1538-4632.1995.tb00338.x

34 R Core Team. R: A Language and Environment for Statistical Computing. Vienna, Austria: R Foundation for Statistical Computing 2019. Retrieved from <https://www.R-project.org>

35 Altmayer CA, Ardal S, Woodward GL, *et al*. Variation in emergency department visits for conditions that may be treated in alternative primary care settings. *Can J Emerg Med* 2015;**7**:252-6.

doi:10.1017/s1481803500014391

36 Gilliland JA, Shah TI, Clark A, *et al*. A geospatial approach to understanding inequalities in accessibility to primary care among vulnerable populations. *PLoS One* 2019;**14**:e0210113.

doi:10.1371/journal.pone.0210113

37 Marmot M. Social determinants of health inequalities. *The Lancet* 2005;**365**:1099-104.

doi:10.1016/s0140-6736(05)74234-3

38 Gehlke CE, Biehl K. Certain Effects of Grouping Upon the Size of the Correlation Coefficient in Census Tract Material. *Journal of the American Statistical Association* 1934;**29**:169.

doi:10.2307/2277827

## Geographic Variation in Preventable Hospitalizations Across Canada

1  
2 39 Flowerdew R, Manley DJ, Sabel CE. Neighbourhood effects on health: does it matter where  
3  
4 you draw the boundaries? *Soc Sci Med* 2008;**66**:1241-55. doi:10.1016/j.socscimed.2007.11.042  
5

6 40 Openshaw S. *The Modifiable Areal Unit Problem - Concepts and Techniques in Modern*  
7  
8 *Geography*. Norwich, UK: Geo Books 1984.  
9  
10  
11  
12  
13  
14  
15  
16  
17  
18  
19  
20  
21  
22  
23  
24  
25  
26  
27  
28  
29  
30  
31  
32  
33  
34  
35  
36  
37  
38  
39  
40  
41  
42  
43  
44  
45  
46  
47  
48  
49  
50  
51  
52  
53  
54  
55  
56  
57  
58  
59  
60

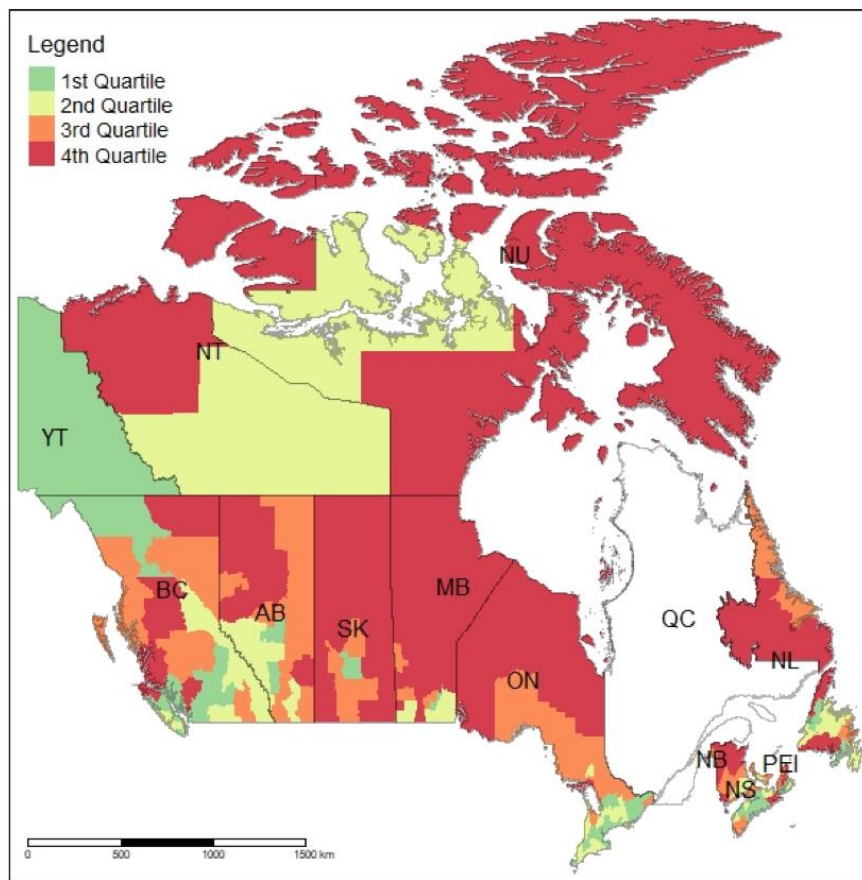

**Figure 1.** Age-Standardized Annualized Hospitalization Rates (quartiles) for Ambulatory Care Sensitive Conditions per 100,000 population: Canada (Census Divisions)



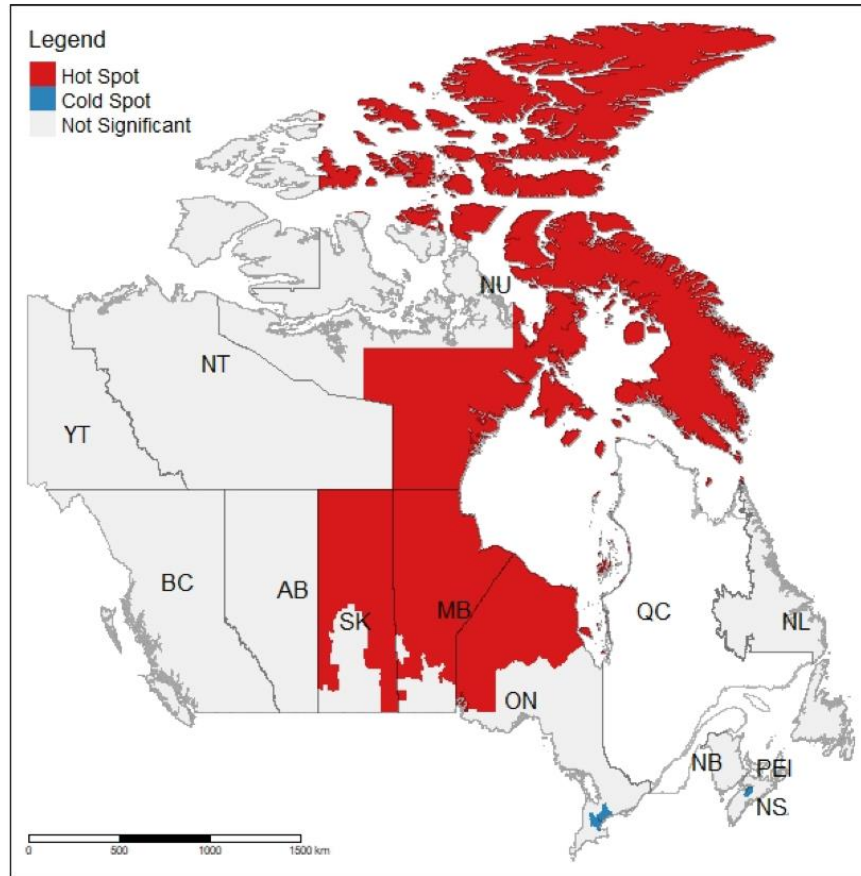

33 **Figure 2.** Hot Spots and Cold Spots in Preventable Hospitalizations: Canada (Census Divisions)

34 *Note:* This map identifies clusters of Census Divisions with significantly higher (hots spots) or lower (cold spots)  
35 rates of hospitalizations for ambulatory care sensitive conditions compared to their neighbors.  
36

STROBE Statement—Checklist of items that should be included in reports of *cross-sectional studies*

|                              | Item No    | Recommendation                                                                                                                                                                                                                                                                                                                                                                                                |
|------------------------------|------------|---------------------------------------------------------------------------------------------------------------------------------------------------------------------------------------------------------------------------------------------------------------------------------------------------------------------------------------------------------------------------------------------------------------|
| <b>Title and abstract</b>    | <b>1</b>   | (a) Indicate the study's design with a commonly used term in the title or the abstract<br>(b) Provide in the abstract an informative and balanced summary of what was done and what was found                                                                                                                                                                                                                 |
| <b>Introduction</b>          |            |                                                                                                                                                                                                                                                                                                                                                                                                               |
| Background/rationale         | <b>2</b>   | Explain the scientific background and rationale for the investigation being reported                                                                                                                                                                                                                                                                                                                          |
| Objectives                   | <b>3</b>   | State specific objectives, including any prespecified hypotheses                                                                                                                                                                                                                                                                                                                                              |
| <b>Methods</b>               |            |                                                                                                                                                                                                                                                                                                                                                                                                               |
| Study design                 | <b>4</b>   | Present key elements of study design early in the paper                                                                                                                                                                                                                                                                                                                                                       |
| Setting                      | <b>5</b>   | Describe the setting, locations, and relevant dates, including periods of recruitment, exposure, follow-up, and data collection                                                                                                                                                                                                                                                                               |
| Participants                 | <b>6</b>   | (a) Give the eligibility criteria, and the sources and methods of selection of participants                                                                                                                                                                                                                                                                                                                   |
| Variables                    | <b>7</b>   | Clearly define all outcomes, exposures, predictors, potential confounders, and effect modifiers. Give diagnostic criteria, if applicable                                                                                                                                                                                                                                                                      |
| Data sources/<br>measurement | <b>8*</b>  | For each variable of interest, give sources of data and details of methods of assessment (measurement). Describe comparability of assessment methods if there is more than one group                                                                                                                                                                                                                          |
| Bias                         | <b>9</b>   | Describe any efforts to address potential sources of bias                                                                                                                                                                                                                                                                                                                                                     |
| Study size                   | <b>10</b>  | Explain how the study size was arrived at                                                                                                                                                                                                                                                                                                                                                                     |
| Quantitative variables       | <b>11</b>  | Explain how quantitative variables were handled in the analyses. If applicable, describe which groupings were chosen and why                                                                                                                                                                                                                                                                                  |
| Statistical methods          | <b>12</b>  | (a) Describe all statistical methods, including those used to control for confounding<br>(b) Describe any methods used to examine subgroups and interactions<br>(c) Explain how missing data were addressed<br>(d) If applicable, describe analytical methods taking account of sampling strategy<br>(e) Describe any sensitivity analyses                                                                    |
| <b>Results</b>               |            |                                                                                                                                                                                                                                                                                                                                                                                                               |
| Participants                 | <b>13*</b> | (a) Report numbers of individuals at each stage of study—eg numbers potentially eligible, examined for eligibility, confirmed eligible, included in the study, completing follow-up, and analysed<br>(b) Give reasons for non-participation at each stage<br>(c) Consider use of a flow diagram                                                                                                               |
| Descriptive data             | <b>14*</b> | (a) Give characteristics of study participants (eg demographic, clinical, social) and information on exposures and potential confounders<br>(b) Indicate number of participants with missing data for each variable of interest                                                                                                                                                                               |
| Outcome data                 | <b>15*</b> | Report numbers of outcome events or summary measures                                                                                                                                                                                                                                                                                                                                                          |
| Main results                 | <b>16</b>  | (a) Give unadjusted estimates and, if applicable, confounder-adjusted estimates and their precision (eg, 95% confidence interval). Make clear which confounders were adjusted for and why they were included<br>(b) Report category boundaries when continuous variables were categorized<br>(c) If relevant, consider translating estimates of relative risk into absolute risk for a meaningful time period |
| Other analyses               | 17         | Report other analyses done—eg analyses of subgroups and interactions, and sensitivity analyses                                                                                                                                                                                                                                                                                                                |

1  
2  
3  
4  
5  
6  
7  
8  
9  
10  
11  
12  
13  
14  
15  
16  
17  
18  
19  
20  
21  
22  
23  
24  
25  
26  
27  
28  
29  
30  
31  
32  
33  
34  
35  
36  
37  
38  
39  
40  
41  
42  
43  
44  
45  
46  
47  
48  
49  
50  
51  
52  
53  
54  
55  
56  
57  
58  
59  
60

| <b>Discussion</b>        |    |                                                                                                                                                                            |
|--------------------------|----|----------------------------------------------------------------------------------------------------------------------------------------------------------------------------|
| Key results              | 18 | Summarise key results with reference to study objectives                                                                                                                   |
| Limitations              | 19 | Discuss limitations of the study, taking into account sources of potential bias or imprecision. Discuss both direction and magnitude of any potential bias                 |
| Interpretation           | 20 | Give a cautious overall interpretation of results considering objectives, limitations, multiplicity of analyses, results from similar studies, and other relevant evidence |
| Generalisability         | 21 | Discuss the generalisability (external validity) of the study results                                                                                                      |
| <b>Other information</b> |    |                                                                                                                                                                            |
| Funding                  | 22 | Give the source of funding and the role of the funders for the present study and, if applicable, for the original study on which the present article is based              |

\*Give information separately for exposed and unexposed groups.

**Note:** An Explanation and Elaboration article discusses each checklist item and gives methodological background and published examples of transparent reporting. The STROBE checklist is best used in conjunction with this article (freely available on the Web sites of PLoS Medicine at <http://www.plosmedicine.org/>, Annals of Internal Medicine at <http://www.annals.org/>, and Epidemiology at <http://www.epidem.com/>). Information on the STROBE Initiative is available at [www.strobe-statement.org](http://www.strobe-statement.org).

# BMJ Open

## Geographic Variation in Preventable Hospitalizations Across Canada: A Cross-sectional Study

|                                 |                                                                                                                                                                                                                                                                                                                                                                                                                                                                                                                                                                                                                                                                                                                                                                                                                                                                                                                                                                                                                                                                                                                                                                                                                                                                                                                                                                                                                                                                                                                                                                                                                                |
|---------------------------------|--------------------------------------------------------------------------------------------------------------------------------------------------------------------------------------------------------------------------------------------------------------------------------------------------------------------------------------------------------------------------------------------------------------------------------------------------------------------------------------------------------------------------------------------------------------------------------------------------------------------------------------------------------------------------------------------------------------------------------------------------------------------------------------------------------------------------------------------------------------------------------------------------------------------------------------------------------------------------------------------------------------------------------------------------------------------------------------------------------------------------------------------------------------------------------------------------------------------------------------------------------------------------------------------------------------------------------------------------------------------------------------------------------------------------------------------------------------------------------------------------------------------------------------------------------------------------------------------------------------------------------|
| Journal:                        | <i>BMJ Open</i>                                                                                                                                                                                                                                                                                                                                                                                                                                                                                                                                                                                                                                                                                                                                                                                                                                                                                                                                                                                                                                                                                                                                                                                                                                                                                                                                                                                                                                                                                                                                                                                                                |
| Manuscript ID                   | bmjopen-2020-037195.R1                                                                                                                                                                                                                                                                                                                                                                                                                                                                                                                                                                                                                                                                                                                                                                                                                                                                                                                                                                                                                                                                                                                                                                                                                                                                                                                                                                                                                                                                                                                                                                                                         |
| Article Type:                   | Original research                                                                                                                                                                                                                                                                                                                                                                                                                                                                                                                                                                                                                                                                                                                                                                                                                                                                                                                                                                                                                                                                                                                                                                                                                                                                                                                                                                                                                                                                                                                                                                                                              |
| Date Submitted by the Author:   | 18-Mar-2020                                                                                                                                                                                                                                                                                                                                                                                                                                                                                                                                                                                                                                                                                                                                                                                                                                                                                                                                                                                                                                                                                                                                                                                                                                                                                                                                                                                                                                                                                                                                                                                                                    |
| Complete List of Authors:       | <p>Wilk, Piotr ; University of Western Ontario, Epidemiology &amp; Biostatistics, Paediatrics<br/>         Ali, Shehzad; University of Western Ontario, Epidemiology and Biostatistics<br/>         Anderson, Kelly; University of Western Ontario, Epidemiology &amp; Biostatistics<br/>         Clark, AF; University of Western Ontario, Geography; Children's Health Research Institute<br/>         Cooke, Martin; University of Waterloo, School of Public Health and Health Systems<br/>         Frisbee, Stephanie; University of Western Ontario, Pathology &amp; Laboratory Medicine, and Epidemiology &amp; Biostatistics<br/>         Gilliland, Jason; University of Western Ontario, Geography<br/>         Haan, Michael; University of Western Ontario, Sociology<br/>         Harris, Stewart; University of Western Ontario, Family Medicine<br/>         Kiarasi, Soushyant; University of Western Ontario, Epidemiology and Biostatistics<br/>         Maltby, Alana; University of Western Ontario, Epidemiology and Biostatistics<br/>         Norozi, Kambiz; University of Western Ontario, Paediatrics<br/>         Petrella, Robert; University of Western Ontario, Family Medicine<br/>         Sarma, Sisira; University of Western Ontario, Epidemiology &amp; Biostatistics<br/>         Singh, Sarah; University of Western Ontario, Epidemiology &amp; Biostatistics<br/>         Stranges, Saverio; University of Western Ontario, Epidemiology and Biostatistics<br/>         Thind, Amardeep; University of Western Ontario, Epidemiology and Biostatistics; Studies in Family Medicine</p> |
| <b>Primary Subject Heading</b>: | Epidemiology                                                                                                                                                                                                                                                                                                                                                                                                                                                                                                                                                                                                                                                                                                                                                                                                                                                                                                                                                                                                                                                                                                                                                                                                                                                                                                                                                                                                                                                                                                                                                                                                                   |
| Secondary Subject Heading:      | Epidemiology, Research methods                                                                                                                                                                                                                                                                                                                                                                                                                                                                                                                                                                                                                                                                                                                                                                                                                                                                                                                                                                                                                                                                                                                                                                                                                                                                                                                                                                                                                                                                                                                                                                                                 |
| Keywords:                       | EPIDEMIOLOGY, STATISTICS & RESEARCH METHODS, Quality in health care < HEALTH SERVICES ADMINISTRATION & MANAGEMENT                                                                                                                                                                                                                                                                                                                                                                                                                                                                                                                                                                                                                                                                                                                                                                                                                                                                                                                                                                                                                                                                                                                                                                                                                                                                                                                                                                                                                                                                                                              |
|                                 |                                                                                                                                                                                                                                                                                                                                                                                                                                                                                                                                                                                                                                                                                                                                                                                                                                                                                                                                                                                                                                                                                                                                                                                                                                                                                                                                                                                                                                                                                                                                                                                                                                |

1  
2  
3  
4  
5  
6  
7  
8  
9  
10  
11  
12  
13  
14  
15  
16  
17  
18  
19  
20  
21  
22  
23  
24  
25  
26  
27  
28  
29  
30  
31  
32  
33  
34  
35  
36  
37  
38  
39  
40  
41  
42  
43  
44  
45  
46  
47  
48  
49  
50  
51  
52  
53  
54  
55  
56  
57  
58  
59  
60

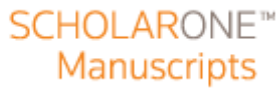

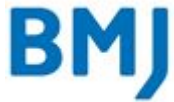

I, the Submitting Author has the right to grant and does grant on behalf of all authors of the Work (as defined in the below author licence), an exclusive licence and/or a non-exclusive licence for contributions from authors who are: i) UK Crown employees; ii) where BMJ has agreed a CC-BY licence shall apply, and/or iii) in accordance with the terms applicable for US Federal Government officers or employees acting as part of their official duties; on a worldwide, perpetual, irrevocable, royalty-free basis to BMJ Publishing Group Ltd ("BMJ") its licensees and where the relevant Journal is co-owned by BMJ to the co-owners of the Journal, to publish the Work in this journal and any other BMJ products and to exploit all rights, as set out in our [licence](#).

The Submitting Author accepts and understands that any supply made under these terms is made by BMJ to the Submitting Author unless you are acting as an employee on behalf of your employer or a postgraduate student of an affiliated institution which is paying any applicable article publishing charge ("APC") for Open Access articles. Where the Submitting Author wishes to make the Work available on an Open Access basis (and intends to pay the relevant APC), the terms of reuse of such Open Access shall be governed by a Creative Commons licence – details of these licences and which [Creative Commons](#) licence will apply to this Work are set out in our licence referred to above.

Other than as permitted in any relevant BMJ Author's Self Archiving Policies, I confirm this Work has not been accepted for publication elsewhere, is not being considered for publication elsewhere and does not duplicate material already published. I confirm all authors consent to publication of this Work and authorise the granting of this licence.

## Geographic Variation in Preventable Hospitalizations Across Canada

**Geographic Variation in Preventable Hospitalizations Across Canada: A Cross-sectional Study**

Piotr Wilk<sup>1\*</sup>, Shehzad Ali<sup>1</sup>, Kelly Anderson<sup>1</sup>, Andrew Clark<sup>2</sup>, Martin Cooke<sup>3</sup>, Stephanie Frisbee<sup>4</sup>,  
Jason Gilliland<sup>2</sup>, Michael Haan<sup>5</sup>, Stewart Harris<sup>6</sup>, Soushyant Kiarasi<sup>1</sup>, Alana Maltby<sup>1</sup>, Kambiz Norozi<sup>7</sup>,  
Robert Petrella<sup>6</sup>, Sisira Sarma<sup>1</sup>, Sarah Singh<sup>1</sup>, Saverio Stranges<sup>1</sup>, Amardeep Thind<sup>1</sup>

<sup>1</sup>Department of Epidemiology and Biostatistics, Western University, London, Canada

<sup>2</sup>Department of Geography, Western University, London, Canada

<sup>3</sup>School of Public Health and Health Systems, University of Waterloo, Waterloo, Canada

<sup>4</sup>Department of Pathology and Laboratory Medicine, Western University, London, Canada

<sup>5</sup>Department of Sociology, Western University, London, Canada

<sup>6</sup>Department of Family Medicine, Western University, London, Canada

<sup>7</sup>Department of Paediatrics, Western University, London, Canada

\* Corresponding Author - Piotr Wilk

P: 519-661-2111x89109, F: 519.661.3766, E: pwilk3@uwo.ca

Associate Professor

Department of Epidemiology & Biostatistics, Schulich School of Medicine and Dentistry, Western University, Kresge Building, Room K201, 1151 Richmond Street, London, Ontario, N6A 5C1

**Manuscript word count: 3,290**

## Geographic Variation in Preventable Hospitalizations Across Canada

### Abstract (281/300 words)

**Objective:** The objective of this study is to examine the magnitude and pattern of small-area geographic variation in rates of preventable hospitalizations for ambulatory care sensitive conditions (ACSC) across Canada (excluding Québec).

**Design and Setting:** A cross-sectional study conducted in Canada (excluding Québec) using data from the 2006 Canadian Census Health and Environment Cohort (CanCHEC) linked prospectively to hospitalization records from the Discharge Abstract Database (DAD) for the three fiscal years: 2006-07, 2007-08, and 2008-09.

**Primary Outcome Measure:** Preventable hospitalizations (ACSC)

**Participants:** The 2006 CanCHEC represents a population of 22,562,120 individuals in Canada (excluding Québec). Of this number, 2,940,150 (13.03 per cent) individuals were estimated to be hospitalized at least once during the 2006-09 fiscal years.

**Methods:** Age-standardized annualized ACSC hospitalization rates per 100,000 population were computed for each of the 190 Census Divisions. To assess the magnitude of Census Division-level geographic variation in rates of preventable hospitalizations, the global Moran's *I* statistic was computed. 'Hot spot' analysis was used to identify the pattern of geographic variation.

**Results:** Of all the hospitalization events reported in Canada during the 2006-09 fiscal years, 337,995 (7.10 per cent) events were ACSC-related hospitalizations. The Moran's *I* statistic (Moran's  $I = 0.355$ ) suggests non-randomness in the spatial distribution of preventable hospitalizations. The findings from the 'hot spot' analysis indicate a cluster of Census Divisions located in predominantly rural and remote parts of Ontario, Manitoba, and Saskatchewan and in eastern and northern parts of Nunavut with significantly higher than average rates of preventable hospitalization.

**Conclusions:** The knowledge generated on the small-area geographic variation in preventable hospitalizations can inform regional, provincial, and national decision makers on planning, allocation of resources and monitoring performance of health service providers.



## Geographic Variation in Preventable Hospitalizations Across Canada

### 61 **Keywords**

62 Preventable hospitalizations; ambulatory care sensitive conditions; spatial analysis

63

### 64 **Strengths and limitations of this study**

- 65 • This study examines the geographic variation in rates of ACSC-related hospitalization using the  
66 2006 Canadian Census Health and Environment Cohort (CanCHEC) linked prospectively to  
67 hospitalization records from the 2006-2009 Discharge Abstract Database (DAD).
- 68 • We determined the magnitude of Census Division-level variation (i.e., spatial autocorrelation) in  
69 rates of ACSC-related hospitalizations by computing the global Moran's *I* statistic, which  
70 assesses the degree to which rates are similar or dissimilar across geographic areas.
- 71 • We identified the location of clusters of Census Divisions with significantly lower (i.e., 'cold  
72 spots') or higher (i.e., 'hot spots') ACSC hospitalization rates using the local indicator of spatial  
73 association (LISA).
- 74 • Geographic areas were defined using the boundaries of Census Divisions, and although results  
75 may differ depending on the definition of geographic units, the methodological approach  
76 adopted in this study is generalizable to other geographic units.
- 77 • Limitations of this study include the absence of hospitalization records in the Discharge  
78 Abstract Database from Québec, and the lower coverage rates for residents of the territories,  
79 young adults, individuals of lower socio-economic status, and rural residents.

## Geographic Variation in Preventable Hospitalizations Across Canada

### INTRODUCTION

Hospitalizations due to ambulatory care sensitive conditions (ACSC) are an important indicator of access and quality of primary care services [1-4], and therefore an important focus of health service research in Canada [1, 5, 6] and internationally [7-11]. Though not all hospitalizations are preventable, with appropriate screening, monitoring, management, and follow-up in primary care settings, many ACSC-related hospitalizations can be avoided [4, 12].

The Canadian Institute of Health Information (CIHI) compiles provincial and health region-level aggregated data on preventable hospitalizations related to the following ACSC: chronic obstructive pulmonary disease (COPD), asthma, heart failure and pulmonary edema, hypertension, angina, diabetes, and grand mal status and other epileptic convulsions [4]. The most recent, age-standardized Canadian estimates from CIHI indicate that in 2017-18, 327 per 100,000 population had an ACSC-related hospitalization, a decrease from 349 per 100,000 population in 2010 [13]. However, these national figures obscure substantial geographic variation in these rates, which has persisted since 2001 when such data became available [14]. In 2017-18, British Columbia had the lowest hospitalization rate for ACSC (294 per 100,000 population) and Nunavut had the highest rate (751 per 100,000 population), a rate approximately 2.5 times greater than in British Columbia [13]. There is also some evidence of substantial variation in these rates within provinces [6, 15-18]. Within Ontario, for example, in 2017-18, there was an almost three-fold difference in preventable hospitalization rates between the Central Local Health Integration Network (LHIN; 195 per 100,000 population) and the North-West LHIN (575 per 100,000 population, respectively) [13].

International research suggests that more pronounced differences in the rates of preventable hospitalizations may be found across smaller geographic areas (i.e., small-area variation), including administrative units responsible for the local delivery of primary care services [8, 10, 19, 20]. However, there is only limited Canadian research examining small-area variation in preventable hospitalizations. A 2008 report commissioned by the CIHI found substantial differences in age-

## Geographic Variation in Preventable Hospitalizations Across Canada

1  
2 105 standardized ACSC-related hospitalization rates across 15 Census Metropolitan Areas (CMA), with  
3  
4 106 Regina CMA having the highest rate of 518 per 100,000 population and Ottawa-Gatineau CMA  
5  
6 107 reporting the lowest rate of 181 per 100,000 population[16]. The scope of this study, however, was  
7  
8  
9 108 restricted to a very limited number of large urban areas.

11 109 To address this gap, the objective of this study was to examine the magnitude and pattern of  
12  
13 110 geographic variation in preventable hospitalizations in Canada (excluding Québec) across small  
14  
15  
16 111 geographic areas, defined by the boundaries of Census Divisions (CDs). CDs are standard census  
17  
18 112 geographic units that generally correspond to municipalities, as determined by provincial and territorial  
19  
20 113 legislation, or neighbouring municipalities amalgamated for the purposes of regional planning and  
21  
22 114 managing some of the common services[21]. CDs vary in their areas and population sizes and, in 2006,  
23  
24  
25 115 there were 190 CDs in Canada (excluding Québec). A reference map of CDs can be found on the  
26  
27 116 Statistics Canada website[22]. We hypothesized that the overall magnitude of geographic variation and  
28  
29  
30 117 the distribution of preventable hospitalizations across CDs in Canada is not random but rather  
31  
32 118 exemplifies spatial dependence where CDs with lower and higher than average ACSC-related  
33  
34 119 hospitalization rates are clustered together. The presence of small-area geographic differences in rates  
35  
36 120 of potentially preventable hospitalizations may suggest the presence of substantial inequalities in access  
37  
38  
39 121 to appropriate primary care across CDs[6, 16, 17]. Thus, identifying CDs with disproportionately high  
40  
41 122 rates of ACSC-related hospitalizations can support decision-makers in planning, allocation of  
42  
43 123 resources, and monitoring performance of health service providers as well as lead to improvement in  
44  
45  
46 124 primary care quality to reduce the burden of preventable hospitalizations[23, 24]. Moreover,  
47  
48 125 methodological approaches and findings from this baseline study can lead to further examination of  
49  
50 126 whether or not clusters of CDs with lower or higher rates of preventable hospitalizations are emerging,  
51  
52  
53 127 stable, or declining.

## METHODS

## Geographic Variation in Preventable Hospitalizations Across Canada

**Data.** To assess the magnitude and pattern of geographic variation in rates of ACSC-related hospitalization, we conducted a cross-sectional study using the 2006 Canadian Census Health and Environment Cohort (CanCHEC) linked prospectively to hospitalization records from the 2006-2009 Discharge Abstract Database (DAD). The 2006 CanCHEC consists of about 20 per cent of the non-institutional respondents to the 2006 Census of Canada who were given long-form census questionnaire, totaling over 4.6 million individuals. The cohort reliably captures characteristics of the entire Canadian population, residing in large metropolitan regions or small remote settlements[25] as it is representative of approximately 95-97 per cent of the provincial populations and 93-94 per cent of the territorial populations[25, 26].

The individual-level records for the members of the 2006 CanCHEC were recently linked by Statistics Canada to the Discharge Abstract Database (DAD) records for three fiscal years: 2006-07, 2007-08, and 2008-09[27]. The DAD is a census of hospital discharges for all provinces and territories excluding Québec, which does not report hospitalization data to the DAD, and includes administrative and clinical data for approximately three million hospital discharges per year[28]. The DAD provides information on the main diagnoses, date of admission, and treatment information. Each hospital record consists of up to 25 diagnoses and 20 intervention codes based on the International Classification of Disease 10<sup>th</sup> Revision, Canadian Modification codes (ICD-10-CA) and volume four of the Canadian Classification of Health Interventions[29, 30].

The record linkage of the 2006 CanCHEC and 2006-09 DAD involved the hierarchical deterministic exact method[31], and was based on personal identifiers common to both data sources (i.e., date of birth, sex, and postal code). A validation study conducted by Statistics Canada indicated that linkage rates approached 100 per cent, with weighted coverage rates exceeding 80 per cent (i.e., the weighted CanCHEC represents over 80% of hospitalizations during the 2006-09 period), and that the linked files are suitable for health-related research as the data are broadly representative of the population of all provinces and territories, excluding Québec[27]. Methodological details on the

## Geographic Variation in Preventable Hospitalizations Across Canada

2006 CanCHEC, data linkage, and findings from the linkage validation study are available elsewhere[27].

**Rates of preventable hospitalizations.** Following the CIHI's previously established definition of ACSC, validated for use in Canada[4], we used the first three characters of each 'most responsible' diagnosis to identify ACSC-related hospitalization events. Selected ACSC include grand mal status and other epileptic convulsions, COPD, asthma, diabetes, heart failure and pulmonary edema, hypertension, and angina (excluding cases with cardiac procedures). For each CD, we computed age-standardized annualized ACSC hospitalization rate per 100,000 population. Specifically, hospitalization records over three fiscal years (i.e., 2006-07, 2007-08, and 2008-09) were pooled to produce a stable estimate of ACSC-related hospitalization rate in each CD and to detect differences between these geographic areas. Sampling weights were used in line with the 2006 census design. The estimated population-level counts of hospitalization events in each CD were rounded to a base of 5 as required by Statistic Canada's confidentiality procedures. The rate for each CD was computed by dividing the estimated annualized and rounded count of ACSC-related hospitalizations in that CD by the total population of that CD and then expressed as per 100,000 population. Finally, direct standardization was carried out using the entire 2006 Census Canada as the reference population and four age groups (i.e., 0-19 years, 20-39, 40-59, 60 and over).

**Patient and Public Involvement.** No patients involved.

**Statistical analysis.** To assess the magnitude of CD-level variation (i.e., spatial autocorrelation) in rates of preventable hospitalizations, we computed the global Moran's  $I$  statistic which assesses the degree to which rates are similar or dissimilar across geographic areas[32]. This was computed using the formula:

$$I = \left( \frac{n}{S_0} \right) \frac{\sum_{i=1}^n \sum_{j=1}^n w_{ij} z_i z_j}{\sum_{i=1}^n z_i^2}$$

## Geographic Variation in Preventable Hospitalizations Across Canada

where,  $z_i$  and  $z_j$  for areas  $i$  and  $j$  are the deviations from the mean,  $w_{ij}$  is the matrix of row-standardized weights, and

$$S_0 = \sum_{i=1}^n \sum_{j=1}^n w_{ij}$$

Moran's  $I$  values range from -1 to +1, which represent extreme negative and positive spatial correlations, respectively (i.e. CDs with either low or high preventable hospitalization rates are geographically clustered together) and 0 indicating spatial randomness (no spatial correlation between CDs). To test the null hypothesis of no spatial correlation, a Monte Carlo simulation was used with 1,000 random permutations to produce the rank of observed Moran's  $I$  in relation to the simulated values, with  $p < 0.05$  indicating statistical significance.

To determine the location of clusters of CDs with significantly lower (i.e., 'cold spots') or higher (i.e., 'hot spots') ACSC hospitalization rates, we assessed whether preventable hospitalization rate in each CD is closer to the rates of its neighbours or to the national average. This was achieved using the local indicator of spatial association (LISA)[32, 33] using the formula:

$$I_i = z_i \sum_{j=1}^n w_{ij} z_j$$

The statistical significance of LISA estimates was tested using a Monte Carlo simulation which compares the actual observed LISA values for each CD with the distribution of repeatedly randomized values. A LISA significance map was produced to identify clusters of CDs with significantly higher or lower rates of ACSC hospitalizations compared to their neighbors. All analyses were conducted using R[34]. Patients were not involved in this study.

## RESULTS

The 2006 CanCHEC represents a population of 22,562,120 individuals in Canada, except Québec. Of this number, 2,940,150 (13.03 per cent) individuals were estimated to be hospitalized at least once during the 2006-09 fiscal years. In total, the weighted number of hospitalization events reported by

## Geographic Variation in Preventable Hospitalizations Across Canada

all members of this population was 4,762,195. Out of that number, 337,995 (7.10 per cent) events were ACSC-related hospitalizations. The most common ACSC diagnosis was COPD (33.23%), followed by heart failure and pulmonary edema (26.10%), angina (16.01%), diabetes (9.47%), asthma (7.15%), grand mal (5.05%), and hypertension (2.99%).

The overall annualized rate of preventable hospitalization for the 2006 CanCHEC for the 2006-09 fiscal years was 499 per 100,000 population (see Table 1). The rates of ACSC-related hospitalizations varied across provinces and territories from the lowest of 436 per 100,000 population in British Columbia to the highest of 1,264 per 100,000 population in Nunavut. As hypothesized, the between CD variation in these rates was even more pronounced than the variation across provinces, with the rates ranging from the lowest of 266 per 100,000 population in the White Horse Plains area near the city of Winnipeg in Manitoba to the highest of 2,131 per 100,000 population in Manitoulin, in central Ontario. The median rate across all CDs was 693 per 100,000 population with the inter-quartile range equal to 351 (i.e., from 564 and 915 per 100,000 population). Similarly, a substantial level of variation can also be observed between CDs within each province. Figure 1 displays the rates of preventable hospitalizations for all CDs in Canada (excluding Québec) and suggests that there is a substantial level of variation in these rates across Canada and within each province and territory. In general, the rates appear to be highest in CDs located in the northern parts of Newfoundland and Labrador, New Brunswick, Ontario, Manitoba, Saskatchewan, and Alberta. They are also relatively high in the interior of British Columbia and in some parts of Nunavut and the Northwest Territories.

## Geographic Variation in Preventable Hospitalizations Across Canada

**Table 1. Ambulatory Care Sensitive Condition Hospitalization Rates across Provinces and Census Divisions, Canada 2006-2009***ACSC rates between CDs within each province*

| <b>Province</b>           | <b>Population (1)</b> | <b>ACSC Events (2)</b> | <b>ACSC Rates (3)</b> | <b>#CDs</b> | <b>Lowest</b> | <b>Median</b> | <b>Highest</b> |
|---------------------------|-----------------------|------------------------|-----------------------|-------------|---------------|---------------|----------------|
| Newfoundland and Labrador | 474,405               | 9,265                  | 651                   | 11          | 513           | 513           | 1,054          |
| Prince Edward Island      | 125,800               | 2,720                  | 721                   | 3           | 672           | 779           | 780            |
| Nova Scotia               | 853,525               | 13,335                 | 521                   | 18          | 368           | 643           | 1,353          |
| New Brunswick             | 696,650               | 17,465                 | 836                   | 15          | 566           | 846           | 1,094          |
| Ontario                   | 11,428,170            | 154,715                | 451                   | 49          | 296           | 581           | 2,131          |
| Manitoba                  | 1,082,900             | 19,595                 | 603                   | 23          | 266           | 827           | 2,112          |
| Saskatchewan              | 907,630               | 23,375                 | 858                   | 18          | 518           | 1,063         | 1,576          |
| Alberta                   | 3,088,730             | 45,325                 | 489                   | 19          | 373           | 708           | 1,401          |
| British Columbia          | 3,810,320             | 49,850                 | 436                   | 28          | 331           | 616           | 1,244          |
| Yukon                     | 28,770                | 460                    | 533                   | 1           | 533           | 533           | 533            |
| Northwest Territories     | 38,440                | 875                    | 759                   | 2           | 667           | 876           | 1,085          |
| Nunavut                   | 26,775                | 1,015                  | 1,264                 | 3           | 564           | 1,215         | 1,540          |
| Canada                    | 22,562,120            | 337,995                | 499                   | 190         | 266           | 693           | 2,131          |

ACSC, Ambulatory Care Sensitive Condition; CD, Census Division

(1) 2006 population size rounded to a base of 10

(2) Estimated population-level counts of ACSC hospitalization events rounded to a base of 5

(3) Standardized and annualized ACSC hospitalization rates per 100,000 population



## Geographic Variation in Preventable Hospitalizations Across Canada

[InsertFigure 1]

The Moran's  $I$  statistic, computed to assess the overall magnitude of variation in preventable hospitalization rates between CDs, was 0.3550 (expected value = -0.0053; variance = 0.0026) suggesting that the overall spatial distribution of preventable hospitalizations between CDs is non-random. The results from the Monte-Carlo simulation of Moran's  $I$  indicated that the null hypothesis of no spatial correlation can be rejected (the rank of the observed Moran's  $I$  = 1,000; the pseudo  $p$ -value = 0.001).

Figure 2 presents the findings from the LISA analysis and depicts the pattern of clustering of CDs with significantly higher ('hot spots') and lower ('cold spots') rates of preventable hospitalizations. It indicates that a relatively large cluster of CDs with higher than average hospitalization rates was located in northern parts of Ontario, Manitoba, and Saskatchewan and across eastern and northern parts of Nunavut ('hot spots'). In addition, two clusters of CDs with lower than average rates ('cold spots') were found, one in the Greater Toronto Area, and one in central Nova Scotia, around the town of Windsor.

[Insert Figure 2]

## DISCUSSION

This study addresses an important gap in the literature by providing information on the magnitude and pattern of geographic variation in preventable hospitalizations in Canada. Specifically, our study contributes to the literature by: (1) providing a quantitative assessment of the magnitude of spatial variation in preventable hospitalizations across small geographic areas (i.e., CDs); (2) identifying geographic areas with significantly lower or higher concentrations of these events (i.e., 'cold spots' and 'hot spots', respectively); and (3) demonstrating how spatial analysis can be applied to future studies of geographic variation in preventable hospitalizations that may involve data on newer census cohorts linked to more recent hospitalization records, when these data become available.

Overall, the results of the spatial analysis provide support for the hypothesis that there is a statistically significant and substantial level of spatial variation in preventable hospitalizations across

## Geographic Variation in Preventable Hospitalizations Across Canada

Canada and clustering of CDs with significantly lower and higher rates, which is a novel finding as the previous studies did not conduct any formal statistical assessment of the magnitude or patterns of geographic variations. The presence of a large cluster of CDs with higher than average ACSC-related hospitalization rates, stretching from northern parts of Ontario, Manitoba, and Saskatchewan and across eastern and northern parts of Nunavut, indicates that CDs with significantly higher rates of preventable hospitalizations are more likely to cluster in northern, predominantly rural and remote regions of Canada. In a CIHI report, rural areas in Canada were found to have approximately 60 per cent higher rates of preventable hospitalizations compared to urban areas [14], potentially due to poor access to primary care in these locations [35, 36]. In contrast, two 'cold spots', characterized by lower than average rates of preventable hospitalizations, were found in predominately urban areas (i.e., in the Greater Toronto Area and in the urban area of Nova Scotia). This pattern is likely related to differences in primary health care in rural compared to urban areas, as barriers related to accessibility (e.g., availability) or quality of primary care services are well known factors related to geographic variation in preventable hospitalizations [7, 23, 24].

It is important to acknowledge that, in addition to availability of primary health care services, the magnitude and pattern of geographic variation in preventable hospitalizations may also be related to differences in socio-demographics, health behaviors, and/or health status characteristics of the individuals residing in each CD (i.e., compositional effect) or to other area-level factors. Berlin et al. [8] argue that although an effective primary care system should aid in the prevention of ACSC-related hospitalizations, these events are also dependent on individual-level factors such as propensity to seek care, severity of disease, compliance issues, financial constraints, or accessibility issues. Research by Falster and colleagues [20] suggests that as much as 36.9 per cent of geographic variation in preventable hospitalizations in Australia was a result of individual-level sociodemographic and health characteristics. The geographic variation in preventable hospitalizations may, in particular, be driven by the well-known social gradient in health, as described by Marmot and colleagues [37]. In a 2008

## Geographic Variation in Preventable Hospitalizations Across Canada

study involving 15 CMA areas, for instance, hospitalizations for ACSC were highest among those with low socio-economic status (SES) and showed a steep gradient between low SES, average SES, and high SES[16]. Thus, further examination of the determinants of geographic variation, with a focus on individual-level factors, would help ascertain why residents of some CDs are more (or less) likely to be hospitalized for an ACSC, compared to residents in other areas of Canada.

**Limitations.** One limitation of any analysis involving the DAD is the absence of hospitalization records from Québec. Since these records are currently not shared with the CIHI or Statistics Canada, we were not able to directly address this limitation. Second, the validation study of the 2006 CanCHEC-DAD linked files indicated that coverage rates were slightly lower for residents of the territories, young adults, individuals of lower SES, and rural residents[27]; however, sampling weights used to extrapolate the observed counts to the whole population accounted for some of this underrepresentation. Furthermore, the boundaries of CDs were used in this study to define geographic areas. Although the Modifiable Areal Unit Problem indicates that the results may differ depending on the definition of geographic units[38-40], the methodological approach adopted in this study is generalizable to other geographic units. The results of this study are also based on the assumption that during the 2006-09 time period, members of the 2006 CanCHEC did not move from CDs that they reported as their home addresses in the 2006 Census; however, residential mobility within the boundaries of each CD would not affect the results. Lastly, estimates generated from the recently released 2006 CanCHEC-DAD linked files may not reflect the current rates of preventable hospitalization in Canada.

Additionally, the CIHI definition of ACSC may not capture all preventable hospitalizations and not all ACSC hospitalizations may be preventable [4, 12]. However, at present, these are the best national data that are available for conducting analysis on small-area geographic variation in preventable hospitalizations. Moreover, for surveillance purposes, findings from the current study can be used as a baseline estimate to be compared with the results of future assessments of geographic

## Geographic Variation in Preventable Hospitalizations Across Canada

variation in preventable hospitalization involving linked files from newer census cohorts, when these data become available.

### CONCLUSIONS

The knowledge on the magnitude and pattern of small-area geographic variation in preventable hospitalizations can inform regional, provincial, and national decision makers on planning resources and monitoring performance of health service providers. Since preventable hospitalizations are an important indicator of access and quality of primary care services, identifying of clusters of CDs with disproportionately high rates of ACSC-related hospitalizations can lead to improvement in primary care quality in these areas to reduce the burden of preventable hospitalizations. Ultimately, this can lead to the reduction of substantial inequalities in the rates of preventable hospitalizations across Canada.

The current study provides valuable insight into small-area geographic variation in preventable hospitalizations in Canada. We found that the pattern of 'hot spots' in ACSC-related hospitalizations do not follow provincial boundaries, which is a novel observation in the Canadian context and suggests the need to focus on intra-provincial comparisons. As suggested by the existing literature, there may be a wide range of interrelated factors that can potentially contribute to this variation. Although it is often assumed that small-area geographic variation in preventable hospitalizations is related to characteristics of the health care system, this variation may also be related to individual- and area-level socioeconomic factors rooted in the local contexts [10, 20, 23], or to health related behavior associated with low SES.

Ultimately, people interact with the health care system in the geographic areas in which they reside, and future research should assess the nature of these interactions and how they may contribute to the observed geographic variation in ACSC-related hospitalizations.

## Geographic Variation in Preventable Hospitalizations Across Canada

**Figure Captions**

**Figure 1.** Age-Standardized Annualized Hospitalization Rates (quartiles) for Ambulatory Care Sensitive

Conditions per 100,000 population: Canada (Census Divisions)

**Figure 2.** Hot Spots and Cold Spots in Preventable Hospitalizations: Canada (Census Divisions)

*Note:* This map identifies clusters of Census Divisions with significantly higher (hot spots) or lower (cold spots) rates of hospitalizations for ambulatory care sensitive conditions compared to their neighbors.

For peer review only

## Geographic Variation in Preventable Hospitalizations Across Canada

### **Funding**

This research was funded by the Schulich School of Medicine & Dentistry through the Collaborative Research Seed Grant and by the Children's Health Foundation.

### **Competing Interest Statement**

None declared

### **Contributors**

All authors contributed to the design of the study. PW planned and undertook statistical analysis and interpretation. PW and AM drafted and finalized the manuscript with review by SA, KA, AC, MC, SF, JG, MH, SH, SK, KN, RP, S Sarma, S Singh, S Stranges, and AT. All authors reviewed, commented on and approved the final manuscript. The corresponding author attests that all listed authors meet authorship criteria and that no others meeting the criteria have been omitted. PW had full access to the data.

### **Ethics**

Ethical approval for this study was not required as the study uses anonymous and confidential secondary data from Statistics Canada. Consent from respondents was obtained at the time of data collection. Data were provided by Statistics Canada through the Research Data Centres program and accessed under the *Statistics Act* of Canada. The analyses and the interpretation are the authors' alone.

### **Data availability statement**

No data are available.

## Geographic Variation in Preventable Hospitalizations Across Canada

## References

- 1  
2 347  
3 348  
4 349 1 Sanmartin C, Khan S, LHAD Research Team. Hospitalizations for Ambulatory Care Sensitive  
5  
6  
7 350 Conditions (ACSC): The factors that matter. *Health Research Working Paper Series*. Ottawa: Statistics  
8  
9 351 Canada, Health Information and Research Division 2011:30.
- 10  
11 352 2 Magan P, Otero A, Alberquilla A, *et al*. Geographic variations in avoidable hospitalizations in  
12  
13  
14 353 the elderly, in a health system with universal coverage. *BMC Health Services Research* 2008;**8**.  
15  
16 354 doi:10.1186/1472-6963-8-42
- 17  
18 355 3 Brown AD, Goldacre MJ, Hicks N, *et al*. Hospitalization for ambulatory care-sensitive  
19  
20  
21 356 conditions: a method for comparative access and quality studies using routinely collected statistics.  
22  
23 357 *Canadian journal of public health = Revue canadienne de sante publique* 2001;**92**:155-9.
- 24  
25 358 4 Canadian Institute for Health Information. Ambulatory Care Sensitive Conditions. CIHI 2017.  
26  
27  
28 359 Retrieved from <http://indicatorlibrary.cihi.ca/display/HSPIL/Ambulatory+Care+Sensitive+Conditions>
- 29  
30 360 5 Cloutier-Fisher D, Penning MJ, Zheng C, *et al*. The devil is in the details: trends in avoidable  
31  
32 361 hospitalization rates by geography in British Columbia, 1990-2000. *BMC Health Serv Res* 2006;**6**:104.  
33  
34 362 doi:10.1186/1472-6963-6-104
- 35  
36  
37 363 6 Sanchez M, Vellanky S, Herring J, *et al*. Variations in Canadian rates of hospitalization for  
38  
39 364 ambulatory care sensitive conditions. *Healthcare quarterly (Toronto, Ont)* 2008;**11**:20-2.
- 40  
41 365 7 Billings J, Anderson GM, Newman LS. Recent findings on preventable hospitalizations. *Health*  
42  
43  
44 366 *affairs (Project Hope)* 1996;**15**:239-49. <http://content.healthaffairs.org/content/15/3/239.full.pdf>
- 45  
46 367 8 Berlin C, Busato A, Rosemann T, *et al*. Avoidable hospitalizations in Switzerland: a small area  
47  
48 368 analysis on regional variation, density of physicians, hospital supply and rurality. *BMC Health Services*  
49  
50 369 *Research* 2014;**14**:289. doi:10.1186/1472-6963-14-289
- 51  
52  
53 370 9 Weeks WB, Ventelou B, Paraponaris A. Rates of admission for ambulatory care sensitive  
54  
55 371 conditions in France in 2009–2010: trends, geographic variation, costs, and an international  
56  
57 372 comparison. *European Journal of Health Economics* 2016;**17**:453-70. doi:10.1007/s10198-015-0692-y

## Geographic Variation in Preventable Hospitalizations Across Canada

- 1  
2 373 10 Ansari Z, Rowe S, Ansari H, *et al.* Small area analysis of ambulatory care sensitive conditions  
3  
4 374 in Victoria, Australia. *Popul Health Manag* 2013;**16**:190-200. doi:10.1089/pop.2012.0047  
5
- 6 375 11 Busby J, Purdy S, Hollingworth W. How do population, general practice and hospital factors  
7  
8 influence ambulatory care sensitive admissions: a cross sectional study. *BMC Family Practice* 2017;**18**.  
9 376  
10 doi:10.1186/s12875-017-0638-9  
11 377  
12
- 13 378 12 Walker RL, Chen G, McAlister FA, *et al.* Hospitalization for uncomplicated hypertension: An  
14  
15 ambulatory care sensitive condition. *Canadian Journal of Cardiology* 2013;**29**:1462-9.  
16 379  
17 doi:10.1016/j.cjca.2013.05.002  
18 380  
19
- 20 381 13 Canadian Institute for Health Information. Your Health System - Ambulatory Care Sensitive  
21  
22 Conditions. CIHI 2019. Retrieved from  
23 382  
24 <https://yourhealthsystem.cihi.ca/hsp/indepth?lang=en#/indicator/019/2/C5001/>  
25 383  
26
- 27 384 14 Canadian Institute for Health Information. Health Indicators. Ottawa, ON 2008. Retrieved from  
28  
29 [https://secure.cihi.ca/free\\_products/HealthIndicators2008\\_ENGweb.pdf](https://secure.cihi.ca/free_products/HealthIndicators2008_ENGweb.pdf)  
30 385  
31
- 32 386 15 Lin G, Allan DE, Penning MJ. Examining Distance Effects on Hospitalizations Using GIS: A  
33  
34 387 Study of Three Health Regions in British Columbia, Canada. *Environment and Planning A*  
35  
36 388 2002;**34**:2037-53. doi:10.1068/a3528  
37  
38
- 39 389 16 Canadian Institute for Health Information. Reducing Gaps in Health: A Focus on Socio-  
40  
41 390 Economic Status in Urban Canada. Ottawa, ON 2008.  
42
- 43 391 17 Manitoba Centre for Health Policy and Evaluation. Concept: Ambulatory Care Sensitive (ACS)  
44  
45 392 Conditions. 2007. Retrieved from [http://mchp-](http://mchp-appserv.cpe.umanitoba.ca/viewConcept.php?conceptID=1023)  
46  
47 [appserv.cpe.umanitoba.ca/viewConcept.php?conceptID=1023](http://mchp-appserv.cpe.umanitoba.ca/viewConcept.php?conceptID=1023)  
48 393  
49
- 50 394 18 Fransoo R, Martens P, The Need to Know Team, *et al.* The 2013 RHA Indicators Atlas.  
51  
52 395 Winnipeg, MB 2013. Retrieved from [http://mchp-](http://mchp-appserv.cpe.umanitoba.ca/reference//RHA_2013_web_version.pdf)  
53  
54 [appserv.cpe.umanitoba.ca/reference//RHA\\_2013\\_web\\_version.pdf](http://mchp-appserv.cpe.umanitoba.ca/reference//RHA_2013_web_version.pdf)  
55 396  
56  
57  
58  
59  
60



## Geographic Variation in Preventable Hospitalizations Across Canada

- 1  
2 397 19 Arandelovic A, Acampora A, Federico B, *et al.* The use of preventable hospitalization for  
3  
4 398 monitoring the performance of local health authorities in long-term care. *Health Policy* 2018.  
5  
6 399 doi:10.1016/j.healthpol.2018.01.008
- 8  
9 400 20 Falster MO, Jorm LR, Douglas KA, *et al.* Sociodemographic and health characteristics, rather  
10  
11 401 than primary care supply, are major drivers of geographic variation in preventable hospitalizations in  
12  
13 402 Australia. *Medical Care* 2015;**53**:436-45. doi:10.1097/MLR.0000000000000342
- 15  
16 403 21 Statistics Canada. Census division (CD). 2015. Retrieved from  
17  
18 404 <http://www12.statcan.gc.ca/census-recensement/2011/ref/dict/geo008-eng.cfm>
- 19  
20 405 22 Statistics Canada. Census Divisions, 2006 Reference Maps. 2006. Retrieved from  
21  
22 406 [http://www12.statcan.gc.ca/census-recensement/2011/geo/map-carte/pdf/030114\\_0304-0418\\_2006.pdf](http://www12.statcan.gc.ca/census-recensement/2011/geo/map-carte/pdf/030114_0304-0418_2006.pdf)
- 24  
25 407 23 Ansari Z, Laditka JN, Laditka SB. Access to Health Care and Hospitalization for Ambulatory  
26  
27 408 Care Sensitive Conditions. *Medical Care Research and Review* 2006;**63**:719-41.  
28  
29 409 doi:doi:10.1177/1077558706293637
- 31  
32 410 24 Rosano A, Loha CA, Falvo R, *et al.* The relationship between avoidable hospitalization and  
33  
34 411 accessibility to primary care: a systematic review. *Eur J Public Health* 2013;**23**:356-60.  
35  
36 412 doi:10.1093/eurpub/cks053
- 38  
39 413 25 Statistics Canada. 2006 Census of Population. Statistics Canada 2006. Retrieved from  
40  
41 414 <http://www12.statcan.gc.ca/census-recensement/2006/index-eng.cfm>
- 42  
43 415 26 Statistics Canada. Census Profile, 2016 Census. 2018. Retrieved from  
44  
45 416 <http://www12.statcan.gc.ca/census-recensement/2016/dp-pd/prof/index.cfm?Lang=E>
- 47  
48 417 27 Rotermann M, Sanmartin C, Trudeau R, *et al.* Linked 2006 Census and hospital data in Canada.  
49  
50 418 *Health Reports* 2015;**26**:10-20. <http://www.statcan.gc.ca/pub/82-003-x/2015010/article/14228-eng.pdf>
- 51  
52 419 28 Canadian Institute for Health Information. Data Quality Documentation, Discharge Abstract  
53  
54 420 Database—Multi-Year Information. Ottawa: CIHI 2012. Retrieved from  
55  
56 421 [https://www.cihi.ca/en/dad\\_multi-year\\_en.pdf](https://www.cihi.ca/en/dad_multi-year_en.pdf)
- 58  
59  
60

## Geographic Variation in Preventable Hospitalizations Across Canada

- 1  
2 422 29 Canadian Institute for Health Information. International Statistical Classification of Diseases  
3  
4 423 and Related Health Problems, 10th Revision. Ottawa: CIHI 2006.  
5  
6 424 30 Canadian Institute for Health Information. Canadian Classification of Health Interventions.  
7  
8  
9 425 Ottawa, ON 2006. Retrieved from  
10  
11 426 [http://hcaiinfo.ca/Health\\_Care\\_Facility\\_Provider/documents/appendices/CCI\\_Vol4\\_2006%20Alpha%20](http://hcaiinfo.ca/Health_Care_Facility_Provider/documents/appendices/CCI_Vol4_2006%20Alpha%20Index.pdf)  
12  
13 427 [Index.pdf](http://hcaiinfo.ca/Health_Care_Facility_Provider/documents/appendices/CCI_Vol4_2006%20Alpha%20Index.pdf)  
14  
15  
16 428 31 Bernier J, Nobrega K. Overview of record linkage. *SYMPOSIUM 99: Combining Data from*  
17  
18 429 *Different Sources*. Ottawa, ON: Statistics Canada 1999.  
19  
20 430 32 Moran PA. A test for the serial independence of residuals. *Biometrika* 1950;**37**:178-81.  
21  
22  
23 431 doi:10.2307/2332162  
24  
25 432 33 Anselin L. Local Indicators of Spatial Association-LISA. *Geographical Analysis* 1995;**27**:93-  
26  
27 433 115. doi:10.1111/j.1538-4632.1995.tb00338.x  
28  
29  
30 434 34 R Core Team. R: A Language and Environment for Statistical Computing. Vienna, Austria: R  
31  
32 435 Foundation for Statistical Computing 2019. Retrieved from <https://www.R-project.org>  
33  
34 436 35 Altmayer CA, Ardal S, Woodward GL, *et al*. Variation in emergency department visits for  
35  
36 437 conditions that may be treated in alternative primary care settings. *Can J Emerg Med* 2015;**7**:252-6.  
37  
38  
39 438 doi:10.1017/s1481803500014391  
40  
41 439 36 Gilliland JA, Shah TI, Clark A, *et al*. A geospatial approach to understanding inequalities in  
42  
43 440 accessibility to primary care among vulnerable populations. *PLoS One* 2019;**14**:e0210113.  
44  
45  
46 441 doi:10.1371/journal.pone.0210113  
47  
48 442 37 Marmot M. Social determinants of health inequalities. *The Lancet* 2005;**365**:1099-104.  
49  
50 443 doi:10.1016/s0140-6736(05)74234-3  
51  
52  
53 444 38 Gehlke CE, Biehl K. Certain Effects of Grouping Upon the Size of the Correlation Coefficient  
54  
55 445 in Census Tract Material. *Journal of the American Statistical Association* 1934;**29**:169.  
56  
57 446 doi:10.2307/2277827  
58  
59  
60

## Geographic Variation in Preventable Hospitalizations Across Canada

- 1  
2 447 39 Flowerdew R, Manley DJ, Sabel CE. Neighbourhood effects on health: does it matter where  
3  
4 448 you draw the boundaries? *Soc Sci Med* 2008;**66**:1241-55. doi:10.1016/j.socscimed.2007.11.042  
5  
6 449 40 Openshaw S. *The Modifiable Areal Unit Problem - Concepts and Techniques in Modern*  
7  
8  
9 450 *Geography*. Norwich, UK: Geo Books 1984.  
10  
11  
12 451

For peer review only

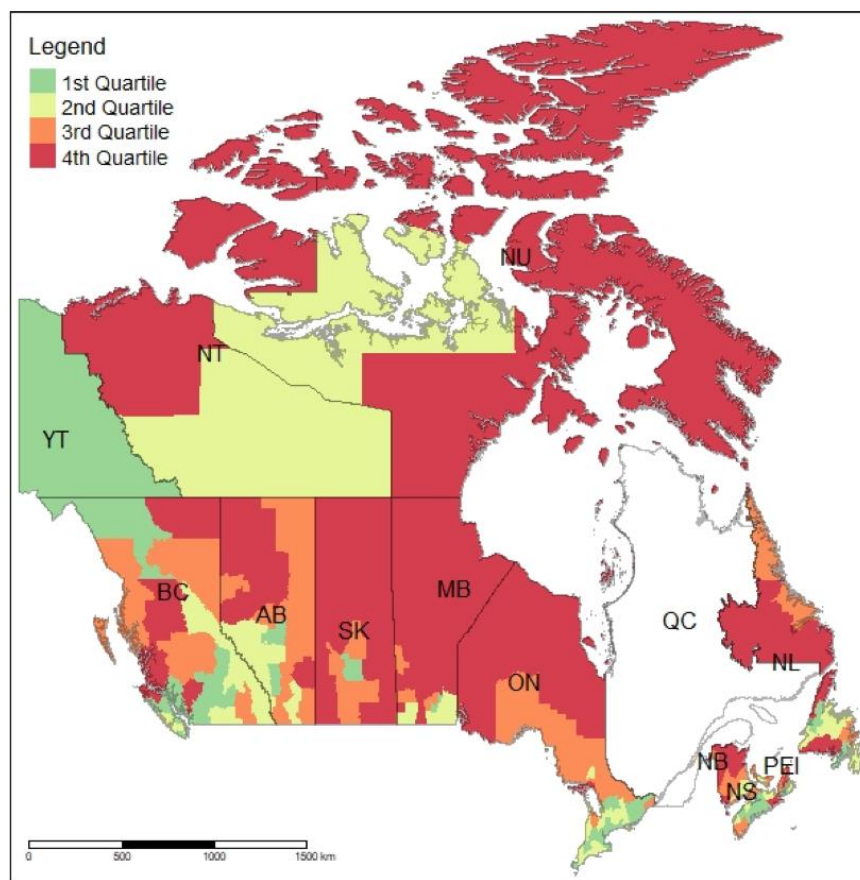

33 **Figure 1.** Age-Standardized Annualized Hospitalization Rates (quartiles) for Ambulatory Care  
34 Sensitive Conditions per 100,000 population: Canada (Census Divisions)

35  
36  
37  
38  
39  
40  
41  
42  
43  
44  
45  
46  
47  
48  
49  
50  
51  
52  
53  
54  
55  
56  
57  
58  
59  
60

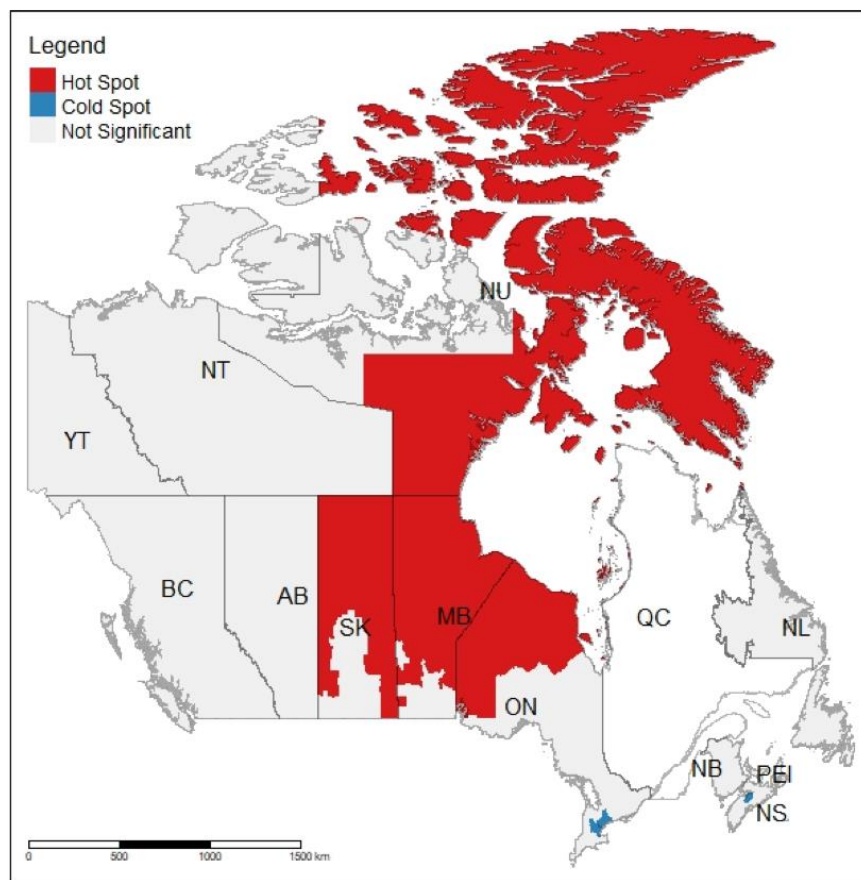

32  
33 **Figure 2.** Hot Spots and Cold Spots in Preventable Hospitalizations: Canada (Census Divisions)

34 *Note:* This map identifies clusters of Census Divisions with significantly higher (hots spots) or lower (cold spots)  
35 rates of hospitalizations for ambulatory care sensitive conditions compared to their neighbors.  
36

**STROBE 2007 (v4) Statement—Checklist of items that should be included in reports of *cross-sectional studies***

| Section/Topic                | Item # | Recommendation                                                                                                                                                                       | Reported on page #                     |
|------------------------------|--------|--------------------------------------------------------------------------------------------------------------------------------------------------------------------------------------|----------------------------------------|
| <b>Title and abstract</b>    | 1      | (a) Indicate the study's design with a commonly used term in the title or the abstract                                                                                               | Page 1, Line 7                         |
|                              |        | (b) Provide in the abstract an informative and balanced summary of what was done and what was found                                                                                  | Page 2                                 |
| <b>Introduction</b>          |        |                                                                                                                                                                                      |                                        |
| Background/rationale         | 2      | Explain the scientific background and rationale for the investigation being reported                                                                                                 | Pages 4-5                              |
| Objectives                   | 3      | State specific objectives, including any prespecified hypotheses                                                                                                                     | Page 5, Lines 132-50                   |
| <b>Methods</b>               |        |                                                                                                                                                                                      |                                        |
| Study design                 | 4      | Present key elements of study design early in the paper                                                                                                                              | Page 6, Line 153                       |
| Setting                      | 5      | Describe the setting, locations, and relevant dates, including periods of recruitment, exposure, follow-up, and data collection                                                      | Page 6, Lines 153-59                   |
| Participants                 | 6      | (a) Give the eligibility criteria, and the sources and methods of selection of participants                                                                                          | Page 6, Lines 155-60                   |
| Variables                    | 7      | Clearly define all outcomes, exposures, predictors, potential confounders, and effect modifiers. Give diagnostic criteria, if applicable                                             | Page 7, Lines 177-81                   |
| Data sources/<br>measurement | 8*     | For each variable of interest, give sources of data and details of methods of assessment (measurement). Describe comparability of assessment methods if there is more than one group | Page 6, Lines 163-69;<br>lines 183-193 |
| Bias                         | 9      | Describe any efforts to address potential sources of bias                                                                                                                            |                                        |
| Study size                   | 10     | Explain how the study size was arrived at                                                                                                                                            | Page 6, Lines 172-77                   |
| Quantitative variables       | 11     | Explain how quantitative variables were handled in the analyses. If applicable, describe which groupings were chosen and why                                                         | Page 7, Lines 179-93                   |
| Statistical methods          | 12     | (a) Describe all statistical methods, including those used to control for confounding                                                                                                | Pages 7, 8                             |
|                              |        | (b) Describe any methods used to examine subgroups and interactions                                                                                                                  |                                        |
|                              |        | (c) Explain how missing data were addressed                                                                                                                                          |                                        |
|                              |        | (d) If applicable, describe analytical methods taking account of sampling strategy                                                                                                   | Page 7, Lines 184-87                   |
|                              |        | (e) Describe any sensitivity analyses                                                                                                                                                |                                        |
| <b>Results</b>               |        |                                                                                                                                                                                      |                                        |

|                          |     |                                                                                                                                                                                                                                                                                                                                                                                                               |                            |
|--------------------------|-----|---------------------------------------------------------------------------------------------------------------------------------------------------------------------------------------------------------------------------------------------------------------------------------------------------------------------------------------------------------------------------------------------------------------|----------------------------|
| Participants             | 13* | (a) Report numbers of individuals at each stage of study—eg numbers potentially eligible, examined for eligibility, confirmed eligible, included in the study, completing follow-up, and analysed<br>(b) Give reasons for non-participation at each stage<br>(c) Consider use of a flow diagram                                                                                                               |                            |
| Descriptive data         | 14* | (a) Give characteristics of study participants (eg demographic, clinical, social) and information on exposures and potential confounders<br>(b) Indicate number of participants with missing data for each variable of interest                                                                                                                                                                               | Pages 8,9 Lines 220-28     |
| Outcome data             | 15* | Report numbers of outcome events or summary measures                                                                                                                                                                                                                                                                                                                                                          | Pages 8,9 Lines 222-43     |
| Main results             | 16  | (a) Give unadjusted estimates and, if applicable, confounder-adjusted estimates and their precision (eg, 95% confidence interval). Make clear which confounders were adjusted for and why they were included<br>(b) Report category boundaries when continuous variables were categorized<br>(c) If relevant, consider translating estimates of relative risk into absolute risk for a meaningful time period | Pages 10,11                |
| Other analyses           | 17  | Report other analyses done—eg analyses of subgroups and interactions, and sensitivity analyses                                                                                                                                                                                                                                                                                                                |                            |
| <b>Discussion</b>        |     |                                                                                                                                                                                                                                                                                                                                                                                                               |                            |
| Key results              | 18  | Summarise key results with reference to study objectives                                                                                                                                                                                                                                                                                                                                                      | Page 12, Lines 276-91      |
| Limitations              | 19  | Discuss limitations of the study, taking into account sources of potential bias or imprecision. Discuss both direction and magnitude of any potential bias                                                                                                                                                                                                                                                    | Pages 13, 14 Lines 317-39  |
| Interpretation           | 20  | Give a cautious overall interpretation of results considering objectives, limitations, multiplicity of analyses, results from similar studies, and other relevant evidence                                                                                                                                                                                                                                    | Pages 12, 13 Lines 292-316 |
| Generalisability         | 21  | Discuss the generalisability (external validity) of the study results                                                                                                                                                                                                                                                                                                                                         | Page 13, 14 Lines 332-39   |
| <b>Other information</b> |     |                                                                                                                                                                                                                                                                                                                                                                                                               |                            |
| Funding                  | 22  | Give the source of funding and the role of the funders for the present study and, if applicable, for the original study on which the present article is based                                                                                                                                                                                                                                                 | Page 15 Lines 364-65       |

\*Give information separately for cases and controls in case-control studies and, if applicable, for exposed and unexposed groups in cohort and cross-sectional studies.

1  
2 **Note:** An Explanation and Elaboration article discusses each checklist item and gives methodological background and published examples of transparent reporting. The STROBE  
3 checklist is best used in conjunction with this article (freely available on the Web sites of PLoS Medicine at <http://www.plosmedicine.org/>, Annals of Internal Medicine at  
4 <http://www.annals.org/>, and Epidemiology at <http://www.epidem.com/>). Information on the STROBE Initiative is available at [www.strobe-statement.org](http://www.strobe-statement.org).  
5  
6  
7  
8  
9  
10  
11  
12  
13  
14  
15  
16  
17  
18  
19  
20  
21  
22  
23  
24  
25  
26  
27  
28  
29  
30  
31  
32  
33  
34  
35  
36  
37  
38  
39  
40  
41  
42  
43  
44  
45  
46

For peer review only
